# Supplementary material for: The respiratory chain of Klebsiella aerogenes in urine-like conditions: critical roles of NDH-2 and bd-terminal oxidases
Source: Front Microbiol. 2024 Nov 6;15:1479714. doi: 10.3389/fmicb.2024.1479714 (PMC11576283; doi:10.3389/fmicb.2024.1479714)
Supplement: Supplementary file 2 [file Data_Sheet_1.xlsx]

## Sheet: Spectrum Report
CyoA
	Peptide sequence	Protein name	Protein accession numbers	Alternate IDs	Database sources	Protein molecular weight (Da)	Protein identification probability	Exclusive unique peptide count	Exclusive unique spectrum count	Exclusive spectrum count	Percentage of total spectra	Percentage sequence coverage	Manual validation	Assigned	Spectrum name	Previous amino acid	Next amino acid	Peptide identification probability	Mascot Ion score	Mascot Identity score	Mascot Delta Ion Score	Number of enzymatic termini	Fixed modifications identified by spectrum	Variable modifications identified by spectrum	Observed m/z	Actual peptide mass (AMU)	Calculated +1H Peptide Mass (AMU)	Spectrum charge	Actual minus calculated peptide mass (AMU)	Actual minus calculated peptide mass (PPM)	Retention Time (sec)	Total Ion Current	Peptide start index	Peptide stop index	Exclusive	Other Proteins
	GQIGLEQR	Ubiquinol oxidase subunit 2 OS=Klebsiella aerogenes OX=548 GN=cyoA PE=3 SV=1	A0A0F1LA05,A0A0H3FSP7	EAE_12730,cyoA	uniprot-Klebsiella aerogenes.fasta	34774.6	1	6	16	80	0.0002	0.204	possibly correct	TRUE	controllerType=0 controllerNumber=1 scan=12681	K	S	0.968	26.3	27.2	11.9	2		n-term: TMT6plex (+229.16)	565.333	1128.65	1129.65	2	0.005951	5.268	1547.87	29700000	34	41	TRUE
	GQIGLEQR	Ubiquinol oxidase subunit 2 OS=Klebsiella aerogenes OX=548 GN=cyoA PE=3 SV=1	A0A0F1LA05,A0A0H3FSP7	EAE_12730,cyoA	uniprot-Klebsiella aerogenes.fasta	34774.6	1	6	16	80	0.0002	0.204	possibly correct	TRUE	controllerType=0 controllerNumber=1 scan=15580	K	S	0.973	26.9	27	13.9	2		n-term: TMT6plex (+229.16)	565.335	1128.65	1129.65	2	0.009177	8.123	1573.84	48400000	34	41	TRUE
	GQIGLEQR	Ubiquinol oxidase subunit 2 OS=Klebsiella aerogenes OX=548 GN=cyoA PE=3 SV=1	A0A0F1LA05,A0A0H3FSP7	EAE_12730,cyoA	uniprot-Klebsiella aerogenes.fasta	34774.6	1	6	16	80	0.0002	0.204	possibly correct	TRUE	controllerType=0 controllerNumber=1 scan=16079	K	S	0.974	26.7	26.7	16.4	2		n-term: TMT6plex (+229.16)	565.334	1128.65	1129.65	2	0.008303	7.35	1600.1	29200000	34	41	TRUE
	GQIGLEQR	Ubiquinol oxidase subunit 2 OS=Klebsiella aerogenes OX=548 GN=cyoA PE=3 SV=1	A0A0F1LA05,A0A0H3FSP7	EAE_12730,cyoA	uniprot-Klebsiella aerogenes.fasta	34774.6	1	6	16	80	0.0002	0.204	possibly correct	TRUE	controllerType=0 controllerNumber=1 scan=14153	K	S	0.984	29	26.9	9.14	2		n-term: TMT6plex (+229.16)	565.333	1128.65	1129.65	2	0.006669	5.903	1635.56	51200000	34	41	TRUE
	GQIGLEQR	Ubiquinol oxidase subunit 2 OS=Klebsiella aerogenes OX=548 GN=cyoA PE=3 SV=1	A0A0F1LA05,A0A0H3FSP7	EAE_12730,cyoA	uniprot-Klebsiella aerogenes.fasta	34774.6	1	6	16	80	0.0002	0.204	possibly correct	TRUE	controllerType=0 controllerNumber=1 scan=12473	K	S	0.985	29.5	27.2	14	2		n-term: TMT6plex (+229.16)	565.333	1128.65	1129.65	2	0.005153	4.561	1535.4	25600000	34	41	TRUE
	GQIGLEQR	Ubiquinol oxidase subunit 2 OS=Klebsiella aerogenes OX=548 GN=cyoA PE=3 SV=1	A0A0F1LA05,A0A0H3FSP7	EAE_12730,cyoA	uniprot-Klebsiella aerogenes.fasta	34774.6	1	6	16	80	0.0002	0.204	possibly correct	TRUE	controllerType=0 controllerNumber=1 scan=16334	K	S	0.986	30	27.2	14.5	2		n-term: TMT6plex (+229.16)	565.333	1128.65	1129.65	2	0.006023	5.331	1561.82	97600000	34	41	TRUE
	GQIGLEQR	Ubiquinol oxidase subunit 2 OS=Klebsiella aerogenes OX=548 GN=cyoA PE=3 SV=1	A0A0F1LA05,A0A0H3FSP7	EAE_12730,cyoA	uniprot-Klebsiella aerogenes.fasta	34774.6	1	6	16	80	0.0002	0.204	possibly correct	TRUE	controllerType=0 controllerNumber=1 scan=13529	K	S	0.986	30.1	27.2	14	2		n-term: TMT6plex (+229.16)	565.333	1128.65	1129.65	2	0.005433	4.809	1598.57	61600000	34	41	TRUE
	GQIGLEQR	Ubiquinol oxidase subunit 2 OS=Klebsiella aerogenes OX=548 GN=cyoA PE=3 SV=1	A0A0F1LA05,A0A0H3FSP7	EAE_12730,cyoA	uniprot-Klebsiella aerogenes.fasta	34774.6	1	6	16	80	0.0002	0.204	possibly correct	TRUE	controllerType=0 controllerNumber=1 scan=15824	K	S	0.986	29.6	26.7	13.9	2		n-term: TMT6plex (+229.16)	565.334	1128.65	1129.65	2	0.007447	6.592	1586.84	48800000	34	41	TRUE
	GQIGLEQR	Ubiquinol oxidase subunit 2 OS=Klebsiella aerogenes OX=548 GN=cyoA PE=3 SV=1	A0A0F1LA05,A0A0H3FSP7	EAE_12730,cyoA	uniprot-Klebsiella aerogenes.fasta	34774.6	1	6	16	80	0.0002	0.204	possibly correct	TRUE	controllerType=0 controllerNumber=1 scan=13321	K	S	0.987	30.3	27.2	14.4	2		n-term: TMT6plex (+229.16)	565.333	1128.65	1129.65	2	0.005875	5.2	1586.09	44200000	34	41	TRUE
	GQIGLEQR	Ubiquinol oxidase subunit 2 OS=Klebsiella aerogenes OX=548 GN=cyoA PE=3 SV=1	A0A0F1LA05,A0A0H3FSP7	EAE_12730,cyoA	uniprot-Klebsiella aerogenes.fasta	34774.6	1	6	16	80	0.0002	0.204	possibly correct	TRUE	controllerType=0 controllerNumber=1 scan=16590	K	S	0.988	30.5	26.9	14.5	2		n-term: TMT6plex (+229.16)	565.333	1128.65	1129.65	2	0.006263	5.544	1574.48	142000000	34	41	TRUE
	GQIGLEQR	Ubiquinol oxidase subunit 2 OS=Klebsiella aerogenes OX=548 GN=cyoA PE=3 SV=1	A0A0F1LA05,A0A0H3FSP7	EAE_12730,cyoA	uniprot-Klebsiella aerogenes.fasta	34774.6	1	6	16	80	0.0002	0.204	possibly correct	TRUE	controllerType=0 controllerNumber=1 scan=11849	K	S	0.99	32.1	27.2	16	2		n-term: TMT6plex (+229.16)	565.333	1128.65	1129.65	2	0.004867	4.308	1497.15	29100000	34	41	TRUE
	GQIGLEQR	Ubiquinol oxidase subunit 2 OS=Klebsiella aerogenes OX=548 GN=cyoA PE=3 SV=1	A0A0F1LA05,A0A0H3FSP7	EAE_12730,cyoA	uniprot-Klebsiella aerogenes.fasta	34774.6	1	6	16	80	0.0002	0.204	possibly correct	TRUE	controllerType=0 controllerNumber=1 scan=12265	K	S	0.99	32.3	27.1	16.3	2		n-term: TMT6plex (+229.16)	565.332	1128.65	1129.65	2	0.004509	3.991	1522.73	24000000	34	41	TRUE
	GQIGLEQR	Ubiquinol oxidase subunit 2 OS=Klebsiella aerogenes OX=548 GN=cyoA PE=3 SV=1	A0A0F1LA05,A0A0H3FSP7	EAE_12730,cyoA	uniprot-Klebsiella aerogenes.fasta	34774.6	1	6	16	80	0.0002	0.204	possibly correct	TRUE	controllerType=0 controllerNumber=1 scan=13735	K	S	0.99	33.9	27.2	17.9	2		n-term: TMT6plex (+229.16)	565.333	1128.65	1129.65	2	0.005383	4.765	1610.85	113000000	34	41	TRUE
	GQIGLEQR	Ubiquinol oxidase subunit 2 OS=Klebsiella aerogenes OX=548 GN=cyoA PE=3 SV=1	A0A0F1LA05,A0A0H3FSP7	EAE_12730,cyoA	uniprot-Klebsiella aerogenes.fasta	34774.6	1	6	16	80	0.0002	0.204	possibly correct	TRUE	controllerType=0 controllerNumber=1 scan=13944	K	S	0.99	38.7	26.9	22.4	2		n-term: TMT6plex (+229.16)	565.333	1128.65	1129.65	2	0.006111	5.409	1623.22	111000000	34	41	TRUE
	YSPNWSHSNk	Ubiquinol oxidase subunit 2 OS=Klebsiella aerogenes OX=548 GN=cyoA PE=3 SV=1	A0A0F1LA05,A0A0H3FSP7	EAE_12730,cyoA	uniprot-Klebsiella aerogenes.fasta	34774.6	1	6	16	80	0.0002	0.204	possibly correct	TRUE	controllerType=0 controllerNumber=1 scan=22891	K	V	0.972	29.6	29.8	23.7	2		n-term: TMT6plex (+229.16), k10: TMT6plex (+229.16)	559.965	1676.87	1677.87	3	0.00535	3.189	2034.52	47600000	78	87	TRUE
	YSPNWSHSNk	Ubiquinol oxidase subunit 2 OS=Klebsiella aerogenes OX=548 GN=cyoA PE=3 SV=1	A0A0F1LA05,A0A0H3FSP7	EAE_12730,cyoA	uniprot-Klebsiella aerogenes.fasta	34774.6	1	6	16	80	0.0002	0.204	possibly correct	TRUE	controllerType=0 controllerNumber=1 scan=21691	K	V	0.988	33.1	29.8	33.1	2		n-term: TMT6plex (+229.16), k10: TMT6plex (+229.16)	559.965	1676.87	1677.87	3	0.006814	4.061	1970.29	59800000	78	87	TRUE
	YSPNWSHSNk	Ubiquinol oxidase subunit 2 OS=Klebsiella aerogenes OX=548 GN=cyoA PE=3 SV=1	A0A0F1LA05,A0A0H3FSP7	EAE_12730,cyoA	uniprot-Klebsiella aerogenes.fasta	34774.6	1	6	16	80	0.0002	0.204	possibly correct	TRUE	controllerType=0 controllerNumber=1 scan=19561	K	V	0.99	34.2	29.9	30.4	2		n-term: TMT6plex (+229.16), k10: TMT6plex (+229.16)	559.965	1676.87	1677.87	3	0.006007	3.58	1929.27	69800000	78	87	TRUE
	YSPNWSHSNk	Ubiquinol oxidase subunit 2 OS=Klebsiella aerogenes OX=548 GN=cyoA PE=3 SV=1	A0A0F1LA05,A0A0H3FSP7	EAE_12730,cyoA	uniprot-Klebsiella aerogenes.fasta	34774.6	1	6	16	80	0.0002	0.204	possibly correct	TRUE	controllerType=0 controllerNumber=1 scan=20154	K	V	0.99	34.3	29.9	30.3	2		n-term: TMT6plex (+229.16), k10: TMT6plex (+229.16)	559.967	1676.88	1677.87	3	0.01131	6.743	1960.12	73300000	78	87	TRUE
	YSPNWSHSNk	Ubiquinol oxidase subunit 2 OS=Klebsiella aerogenes OX=548 GN=cyoA PE=3 SV=1	A0A0F1LA05,A0A0H3FSP7	EAE_12730,cyoA	uniprot-Klebsiella aerogenes.fasta	34774.6	1	6	16	80	0.0002	0.204	possibly correct	TRUE	controllerType=0 controllerNumber=1 scan=22182	K	V	0.993	36.1	29.8	30.6	2		n-term: TMT6plex (+229.16), k10: TMT6plex (+229.16)	559.966	1676.87	1677.87	3	0.007279	4.338	1995.7	131000000	78	87	TRUE
	YSPNWSHSNk	Ubiquinol oxidase subunit 2 OS=Klebsiella aerogenes OX=548 GN=cyoA PE=3 SV=1	A0A0F1LA05,A0A0H3FSP7	EAE_12730,cyoA	uniprot-Klebsiella aerogenes.fasta	34774.6	1	6	16	80	0.0002	0.204	possibly correct	TRUE	controllerType=0 controllerNumber=1 scan=21941	K	V	0.997	44.8	29.8	38.5	2		n-term: TMT6plex (+229.16), k10: TMT6plex (+229.16)	559.966	1676.87	1677.87	3	0.007276	4.337	1983.28	644000000	78	87	TRUE
	YSPNWSHSNk	Ubiquinol oxidase subunit 2 OS=Klebsiella aerogenes OX=548 GN=cyoA PE=3 SV=1	A0A0F1LA05,A0A0H3FSP7	EAE_12730,cyoA	uniprot-Klebsiella aerogenes.fasta	34774.6	1	6	16	80	0.0002	0.204	possibly correct	TRUE	controllerType=0 controllerNumber=1 scan=21934	K	V	0.997	45.8	29.8	40.9	2		n-term: TMT6plex (+229.16), k10: TMT6plex (+229.16)	839.444	1676.87	1677.87	2	0.006705	3.996	1982.87	44600000	78	87	TRUE
	VTSNSVmNSFFIPR	Ubiquinol oxidase subunit 2 OS=Klebsiella aerogenes OX=548 GN=cyoA PE=3 SV=1	A0A0F1LA05,A0A0H3FSP7	EAE_12730,cyoA	uniprot-Klebsiella aerogenes.fasta	34774.6	1	6	16	80	0.0002	0.204	possibly correct	TRUE	controllerType=0 controllerNumber=1 scan=53782	K	L	0.97	35.3	35.9	31.5	2		n-term: TMT6plex (+229.16), m7: Oxidation (+15.99)	922.487	1842.96	1843.96	2	0.009306	5.047	3760.62	41300000	165	178	TRUE
	VTSNSVMNSFFIPR	Ubiquinol oxidase subunit 2 OS=Klebsiella aerogenes OX=548 GN=cyoA PE=3 SV=1	A0A0F1LA05,A0A0H3FSP7	EAE_12730,cyoA	uniprot-Klebsiella aerogenes.fasta	34774.6	1	6	16	80	0.0002	0.204	possibly correct	TRUE	controllerType=0 controllerNumber=1 scan=69638	K	L	0.985	32	29.7	32	2		n-term: TMT6plex (+229.16)	609.996	1826.96	1827.96	3	0.009884	5.407	4709.3	62200000	165	178	TRUE
	VTSNSVMNSFFIPR	Ubiquinol oxidase subunit 2 OS=Klebsiella aerogenes OX=548 GN=cyoA PE=3 SV=1	A0A0F1LA05,A0A0H3FSP7	EAE_12730,cyoA	uniprot-Klebsiella aerogenes.fasta	34774.6	1	6	16	80	0.0002	0.204	possibly correct	TRUE	controllerType=0 controllerNumber=1 scan=73897	K	L	0.987	32.9	29.7	32.9	2		n-term: TMT6plex (+229.16)	609.996	1826.97	1827.96	3	0.01044	5.709	4597.18	34800000	165	178	TRUE
	VTSNSVmNSFFIPR	Ubiquinol oxidase subunit 2 OS=Klebsiella aerogenes OX=548 GN=cyoA PE=3 SV=1	A0A0F1LA05,A0A0H3FSP7	EAE_12730,cyoA	uniprot-Klebsiella aerogenes.fasta	34774.6	1	6	16	80	0.0002	0.204	possibly correct	TRUE	controllerType=0 controllerNumber=1 scan=54982	K	L	0.988	33.2	29.7	29.5	2		n-term: TMT6plex (+229.16), m7: Oxidation (+15.99)	615.33	1842.97	1843.96	3	0.01747	9.476	3823.3	34800000	165	178	TRUE
	VTSNSVMNSFFIPR	Ubiquinol oxidase subunit 2 OS=Klebsiella aerogenes OX=548 GN=cyoA PE=3 SV=1	A0A0F1LA05,A0A0H3FSP7	EAE_12730,cyoA	uniprot-Klebsiella aerogenes.fasta	34774.6	1	6	16	80	0.0002	0.204	possibly correct	TRUE	controllerType=0 controllerNumber=1 scan=69798	K	L	0.991	34.3	29.7	31.6	2		n-term: TMT6plex (+229.16)	914.489	1826.96	1827.96	2	0.007611	4.163	4719.31	56900000	165	178	TRUE
	VTSnSVmNSFFIPR	Ubiquinol oxidase subunit 2 OS=Klebsiella aerogenes OX=548 GN=cyoA PE=3 SV=1	A0A0F1LA05,A0A0H3FSP7	EAE_12730,cyoA	uniprot-Klebsiella aerogenes.fasta	34774.6	1	6	16	80	0.0002	0.204	possibly correct	TRUE	controllerType=0 controllerNumber=1 scan=55721	K	L	0.994	36.3	29.2	6.51	2		n-term: TMT6plex (+229.16), n4: Deamidated (+0.98), m7: Oxidation (+15.99)	922.98	1843.95	1844.94	2	0.01209	6.553	3865.84	24500000	165	178	TRUE
	VTSNSVmNSFFIPR	Ubiquinol oxidase subunit 2 OS=Klebsiella aerogenes OX=548 GN=cyoA PE=3 SV=1	A0A0F1LA05,A0A0H3FSP7	EAE_12730,cyoA	uniprot-Klebsiella aerogenes.fasta	34774.6	1	6	16	80	0.0002	0.204	possibly correct	TRUE	controllerType=0 controllerNumber=1 scan=58159	K	L	0.997	39.8	29.4	39.8	2		n-term: TMT6plex (+229.16), m7: Oxidation (+15.99)	922.486	1842.96	1843.96	2	0.007688	4.169	3702.5	40600000	165	178	TRUE
	VTSNSVMNSFFIPR	Ubiquinol oxidase subunit 2 OS=Klebsiella aerogenes OX=548 GN=cyoA PE=3 SV=1	A0A0F1LA05,A0A0H3FSP7	EAE_12730,cyoA	uniprot-Klebsiella aerogenes.fasta	34774.6	1	6	16	80	0.0002	0.204	possibly correct	TRUE	controllerType=0 controllerNumber=1 scan=68848	K	L	0.997	40.7	29.7	39.3	2		n-term: TMT6plex (+229.16)	609.995	1826.96	1827.96	3	0.008237	4.506	4660.22	39500000	165	178	TRUE
	VTSNSVmNSFFIPR	Ubiquinol oxidase subunit 2 OS=Klebsiella aerogenes OX=548 GN=cyoA PE=3 SV=1	A0A0F1LA05,A0A0H3FSP7	EAE_12730,cyoA	uniprot-Klebsiella aerogenes.fasta	34774.6	1	6	16	80	0.0002	0.204	possibly correct	TRUE	controllerType=0 controllerNumber=1 scan=53466	K	L	0.997	44.9	29.7	38.8	2		n-term: TMT6plex (+229.16), m7: Oxidation (+15.99)	922.491	1842.97	1843.96	2	0.01746	9.467	3712.56	55800000	165	178	TRUE
	VTSNSVMNSFFIPR	Ubiquinol oxidase subunit 2 OS=Klebsiella aerogenes OX=548 GN=cyoA PE=3 SV=1	A0A0F1LA05,A0A0H3FSP7	EAE_12730,cyoA	uniprot-Klebsiella aerogenes.fasta	34774.6	1	6	16	80	0.0002	0.204	possibly correct	TRUE	controllerType=0 controllerNumber=1 scan=73907	K	L	0.997	47.1	29.7	47.1	2		n-term: TMT6plex (+229.16)	914.489	1826.96	1827.96	2	0.007639	4.179	4597.84	47700000	165	178	TRUE
	VTSNSVMNSFFIPR	Ubiquinol oxidase subunit 2 OS=Klebsiella aerogenes OX=548 GN=cyoA PE=3 SV=1	A0A0F1LA05,A0A0H3FSP7	EAE_12730,cyoA	uniprot-Klebsiella aerogenes.fasta	34774.6	1	6	16	80	0.0002	0.204	possibly correct	TRUE	controllerType=0 controllerNumber=1 scan=69031	K	L	0.997	49.8	29.8	49.8	2		n-term: TMT6plex (+229.16)	609.996	1826.97	1827.96	3	0.01178	6.442	4671.53	138000000	165	178	TRUE
	VTSNSVMnSFFIPR	Ubiquinol oxidase subunit 2 OS=Klebsiella aerogenes OX=548 GN=cyoA PE=3 SV=1	A0A0F1LA05,A0A0H3FSP7	EAE_12730,cyoA	uniprot-Klebsiella aerogenes.fasta	34774.6	1	6	16	80	0.0002	0.204	possibly correct	TRUE	controllerType=0 controllerNumber=1 scan=63245	K	L	0.997	56.5	34.3	34	2		n-term: TMT6plex (+229.16), n8: Deamidated (+0.98)	914.98	1827.95	1828.95	2	0.006901	3.773	4264.5	42200000	165	178	TRUE
	VTSNSVMNSFFIPR	Ubiquinol oxidase subunit 2 OS=Klebsiella aerogenes OX=548 GN=cyoA PE=3 SV=1	A0A0F1LA05,A0A0H3FSP7	EAE_12730,cyoA	uniprot-Klebsiella aerogenes.fasta	34774.6	1	6	16	80	0.0002	0.204	possibly correct	TRUE	controllerType=0 controllerNumber=1 scan=69445	K	L	0.997	52.4	29.7	52.4	2		n-term: TMT6plex (+229.16)	609.995	1826.96	1827.96	3	0.008114	4.439	4696.96	71600000	165	178	TRUE
	VTSNSVmNSFFIPR	Ubiquinol oxidase subunit 2 OS=Klebsiella aerogenes OX=548 GN=cyoA PE=3 SV=1	A0A0F1LA05,A0A0H3FSP7	EAE_12730,cyoA	uniprot-Klebsiella aerogenes.fasta	34774.6	1	6	16	80	0.0002	0.204	possibly correct	TRUE	controllerType=0 controllerNumber=1 scan=53635	K	L	0.997	57.7	34.6	54.9	2		n-term: TMT6plex (+229.16), m7: Oxidation (+15.99)	615.33	1842.97	1843.96	3	0.01839	9.972	3745.71	27800000	165	178	TRUE
	VTSNSVMnSFFIPR	Ubiquinol oxidase subunit 2 OS=Klebsiella aerogenes OX=548 GN=cyoA PE=3 SV=1	A0A0F1LA05,A0A0H3FSP7	EAE_12730,cyoA	uniprot-Klebsiella aerogenes.fasta	34774.6	1	6	16	80	0.0002	0.204	possibly correct	TRUE	controllerType=0 controllerNumber=1 scan=62978	K	L	0.997	57.6	34.2	26.7	2		n-term: TMT6plex (+229.16), n8: Deamidated (+0.98)	914.982	1827.95	1828.95	2	0.01093	5.975	4248.01	30700000	165	178	TRUE
	VTSNSVmNSFFIPR	Ubiquinol oxidase subunit 2 OS=Klebsiella aerogenes OX=548 GN=cyoA PE=3 SV=1	A0A0F1LA05,A0A0H3FSP7	EAE_12730,cyoA	uniprot-Klebsiella aerogenes.fasta	34774.6	1	6	16	80	0.0002	0.204	possibly correct	TRUE	controllerType=0 controllerNumber=1 scan=53595	K	L	0.997	54.2	29.5	54.2	2		n-term: TMT6plex (+229.16), m7: Oxidation (+15.99)	922.487	1842.96	1843.96	2	0.008574	4.65	3743.32	48100000	165	178	TRUE
	VTSNSVmNSFFIPR	Ubiquinol oxidase subunit 2 OS=Klebsiella aerogenes OX=548 GN=cyoA PE=3 SV=1	A0A0F1LA05,A0A0H3FSP7	EAE_12730,cyoA	uniprot-Klebsiella aerogenes.fasta	34774.6	1	6	16	80	0.0002	0.204	possibly correct	TRUE	controllerType=0 controllerNumber=1 scan=54314	K	L	0.997	60.6	34.6	60.6	2		n-term: TMT6plex (+229.16), m7: Oxidation (+15.99)	615.328	1842.96	1843.96	3	0.01198	6.497	3784.8	57400000	165	178	TRUE
	VTSNSVmNSFFIPR	Ubiquinol oxidase subunit 2 OS=Klebsiella aerogenes OX=548 GN=cyoA PE=3 SV=1	A0A0F1LA05,A0A0H3FSP7	EAE_12730,cyoA	uniprot-Klebsiella aerogenes.fasta	34774.6	1	6	16	80	0.0002	0.204	possibly correct	TRUE	controllerType=0 controllerNumber=1 scan=55159	K	L	0.997	56.4	29.7	56.4	2		n-term: TMT6plex (+229.16), m7: Oxidation (+15.99)	922.489	1842.96	1843.96	2	0.01363	7.394	3833.37	61000000	165	178	TRUE
	VTSNSVMNSFFIPR	Ubiquinol oxidase subunit 2 OS=Klebsiella aerogenes OX=548 GN=cyoA PE=3 SV=1	A0A0F1LA05,A0A0H3FSP7	EAE_12730,cyoA	uniprot-Klebsiella aerogenes.fasta	34774.6	1	6	16	80	0.0002	0.204	possibly correct	TRUE	controllerType=0 controllerNumber=1 scan=69174	K	L	0.997	58.9	29.7	55.6	2		n-term: TMT6plex (+229.16)	914.489	1826.96	1827.96	2	0.009283	5.078	4680.34	300000000	165	178	TRUE
	VTSNSVmNSFFIPR	Ubiquinol oxidase subunit 2 OS=Klebsiella aerogenes OX=548 GN=cyoA PE=3 SV=1	A0A0F1LA05,A0A0H3FSP7	EAE_12730,cyoA	uniprot-Klebsiella aerogenes.fasta	34774.6	1	6	16	80	0.0002	0.204	possibly correct	TRUE	controllerType=0 controllerNumber=1 scan=54537	K	L	0.997	59.5	29.7	59.5	2		n-term: TMT6plex (+229.16), m7: Oxidation (+15.99)	615.328	1842.96	1843.96	3	0.01235	6.695	3797.33	60800000	165	178	TRUE
	VTSNSVmNSFFIPR	Ubiquinol oxidase subunit 2 OS=Klebsiella aerogenes OX=548 GN=cyoA PE=3 SV=1	A0A0F1LA05,A0A0H3FSP7	EAE_12730,cyoA	uniprot-Klebsiella aerogenes.fasta	34774.6	1	6	16	80	0.0002	0.204	possibly correct	TRUE	controllerType=0 controllerNumber=1 scan=58642	K	L	0.997	60.1	29.7	59.5	2		n-term: TMT6plex (+229.16), m7: Oxidation (+15.99)	922.488	1842.96	1843.96	2	0.01199	6.503	3728.72	49200000	165	178	TRUE
	VTSNSVMNSFFIPR	Ubiquinol oxidase subunit 2 OS=Klebsiella aerogenes OX=548 GN=cyoA PE=3 SV=1	A0A0F1LA05,A0A0H3FSP7	EAE_12730,cyoA	uniprot-Klebsiella aerogenes.fasta	34774.6	1	6	16	80	0.0002	0.204	possibly correct	TRUE	controllerType=0 controllerNumber=1 scan=68966	K	L	0.997	64.1	29.7	64.1	2		n-term: TMT6plex (+229.16)	914.489	1826.96	1827.96	2	0.008649	4.731	4667.56	219000000	165	178	TRUE
	VTSNSVmNSFFIPR	Ubiquinol oxidase subunit 2 OS=Klebsiella aerogenes OX=548 GN=cyoA PE=3 SV=1	A0A0F1LA05,A0A0H3FSP7	EAE_12730,cyoA	uniprot-Klebsiella aerogenes.fasta	34774.6	1	6	16	80	0.0002	0.204	possibly correct	TRUE	controllerType=0 controllerNumber=1 scan=53917	K	L	0.997	64.7	29.5	63.3	2		n-term: TMT6plex (+229.16), m7: Oxidation (+15.99)	615.327	1842.96	1843.96	3	0.009049	4.907	3762.14	39800000	165	178	TRUE
	VTSNSVmNSFFIPR	Ubiquinol oxidase subunit 2 OS=Klebsiella aerogenes OX=548 GN=cyoA PE=3 SV=1	A0A0F1LA05,A0A0H3FSP7	EAE_12730,cyoA	uniprot-Klebsiella aerogenes.fasta	34774.6	1	6	16	80	0.0002	0.204	possibly correct	TRUE	controllerType=0 controllerNumber=1 scan=54934	K	L	0.997	65.8	29.7	65.8	2		n-term: TMT6plex (+229.16), m7: Oxidation (+15.99)	922.488	1842.96	1843.96	2	0.01197	6.491	3820.3	118000000	165	178	TRUE
	VTSNSVMNSFFIPR	Ubiquinol oxidase subunit 2 OS=Klebsiella aerogenes OX=548 GN=cyoA PE=3 SV=1	A0A0F1LA05,A0A0H3FSP7	EAE_12730,cyoA	uniprot-Klebsiella aerogenes.fasta	34774.6	1	6	16	80	0.0002	0.204	possibly correct	TRUE	controllerType=0 controllerNumber=1 scan=69237	K	L	0.997	66.1	29.7	65.3	2		n-term: TMT6plex (+229.16)	609.995	1826.96	1827.96	3	0.009317	5.097	4684.06	134000000	165	178	TRUE
	VTSNSVMNSFFIPR	Ubiquinol oxidase subunit 2 OS=Klebsiella aerogenes OX=548 GN=cyoA PE=3 SV=1	A0A0F1LA05,A0A0H3FSP7	EAE_12730,cyoA	uniprot-Klebsiella aerogenes.fasta	34774.6	1	6	16	80	0.0002	0.204	possibly correct	TRUE	controllerType=0 controllerNumber=1 scan=68767	K	L	0.997	66.2	29.5	66.2	2		n-term: TMT6plex (+229.16)	914.492	1826.97	1827.96	2	0.01521	8.32	4655.01	30400000	165	178	TRUE
	VTSNSVmNSFFIPR	Ubiquinol oxidase subunit 2 OS=Klebsiella aerogenes OX=548 GN=cyoA PE=3 SV=1	A0A0F1LA05,A0A0H3FSP7	EAE_12730,cyoA	uniprot-Klebsiella aerogenes.fasta	34774.6	1	6	16	80	0.0002	0.204	possibly correct	TRUE	controllerType=0 controllerNumber=1 scan=53815	K	L	0.997	72.7	29.6	72.7	2		n-term: TMT6plex (+229.16), m7: Oxidation (+15.99)	922.488	1842.96	1843.96	2	0.01138	6.172	3756.25	72000000	165	178	TRUE
	VTSNSVMNSFFIPR	Ubiquinol oxidase subunit 2 OS=Klebsiella aerogenes OX=548 GN=cyoA PE=3 SV=1	A0A0F1LA05,A0A0H3FSP7	EAE_12730,cyoA	uniprot-Klebsiella aerogenes.fasta	34774.6	1	6	16	80	0.0002	0.204	possibly correct	TRUE	controllerType=0 controllerNumber=1 scan=69591	K	L	0.997	73.4	29.8	73.4	2		n-term: TMT6plex (+229.16)	914.49	1826.97	1827.96	2	0.01129	6.178	4706.2	58900000	165	178	TRUE
	VTSNSVmNSFFIPR	Ubiquinol oxidase subunit 2 OS=Klebsiella aerogenes OX=548 GN=cyoA PE=3 SV=1	A0A0F1LA05,A0A0H3FSP7	EAE_12730,cyoA	uniprot-Klebsiella aerogenes.fasta	34774.6	1	6	16	80	0.0002	0.204	possibly correct	TRUE	controllerType=0 controllerNumber=1 scan=54038	K	L	0.997	76.4	29.5	76.2	2		n-term: TMT6plex (+229.16), m7: Oxidation (+15.99)	922.487	1842.96	1843.96	2	0.009248	5.015	3769.18	106000000	165	178	TRUE
	VTSNSVmNSFFIPR	Ubiquinol oxidase subunit 2 OS=Klebsiella aerogenes OX=548 GN=cyoA PE=3 SV=1	A0A0F1LA05,A0A0H3FSP7	EAE_12730,cyoA	uniprot-Klebsiella aerogenes.fasta	34774.6	1	6	16	80	0.0002	0.204	possibly correct	TRUE	controllerType=0 controllerNumber=1 scan=54262	K	L	0.997	76.4	29.4	76.4	2		n-term: TMT6plex (+229.16), m7: Oxidation (+15.99)	922.487	1842.96	1843.96	2	0.01035	5.615	3781.88	109000000	165	178	TRUE
	VTSNSVmNSFFIPR	Ubiquinol oxidase subunit 2 OS=Klebsiella aerogenes OX=548 GN=cyoA PE=3 SV=1	A0A0F1LA05,A0A0H3FSP7	EAE_12730,cyoA	uniprot-Klebsiella aerogenes.fasta	34774.6	1	6	16	80	0.0002	0.204	possibly correct	TRUE	controllerType=0 controllerNumber=1 scan=54486	K	L	0.997	78.3	29.4	78.3	2		n-term: TMT6plex (+229.16), m7: Oxidation (+15.99)	922.488	1842.96	1843.96	2	0.01059	5.742	3794.32	124000000	165	178	TRUE
	VTSNSVMNSFFIPR	Ubiquinol oxidase subunit 2 OS=Klebsiella aerogenes OX=548 GN=cyoA PE=3 SV=1	A0A0F1LA05,A0A0H3FSP7	EAE_12730,cyoA	uniprot-Klebsiella aerogenes.fasta	34774.6	1	6	16	80	0.0002	0.204	possibly correct	TRUE	controllerType=0 controllerNumber=1 scan=69382	K	L	0.997	79.1	29.7	79.1	2		n-term: TMT6plex (+229.16)	914.489	1826.96	1827.96	2	0.007665	4.193	4693.09	130000000	165	178	TRUE
	VTSNSVmNSFFIPR	Ubiquinol oxidase subunit 2 OS=Klebsiella aerogenes OX=548 GN=cyoA PE=3 SV=1	A0A0F1LA05,A0A0H3FSP7	EAE_12730,cyoA	uniprot-Klebsiella aerogenes.fasta	34774.6	1	6	16	80	0.0002	0.204	possibly correct	TRUE	controllerType=0 controllerNumber=1 scan=54711	K	L	0.997	80.2	29.5	80.2	2		n-term: TMT6plex (+229.16), m7: Oxidation (+15.99)	922.487	1842.96	1843.96	2	0.00927	5.027	3807.48	112000000	165	178	TRUE
	ATFDQWVAk	Ubiquinol oxidase subunit 2 OS=Klebsiella aerogenes OX=548 GN=cyoA PE=3 SV=1	A0A0F1LA05,A0A0H3FSP7	EAE_12730,cyoA	uniprot-Klebsiella aerogenes.fasta	34774.6	1	6	16	80	0.0002	0.204	possibly correct	TRUE	controllerType=0 controllerNumber=1 scan=57163	R	A	0.981	28.9	27.6	19.1	2		n-term: TMT6plex (+229.16), k9: TMT6plex (+229.16)	508.63	1522.87	1523.86	3	0.01165	7.647	3785.8	110000000	229	237	TRUE
	ATFDQWVAk	Ubiquinol oxidase subunit 2 OS=Klebsiella aerogenes OX=548 GN=cyoA PE=3 SV=1	A0A0F1LA05,A0A0H3FSP7	EAE_12730,cyoA	uniprot-Klebsiella aerogenes.fasta	34774.6	1	6	16	80	0.0002	0.204	possibly correct	TRUE	controllerType=0 controllerNumber=1 scan=56953	R	A	0.986	30.4	27.7	20.2	2		n-term: TMT6plex (+229.16), k9: TMT6plex (+229.16)	508.629	1522.86	1523.86	3	0.009838	6.456	3773.57	118000000	229	237	TRUE
	ATFDQWVAk	Ubiquinol oxidase subunit 2 OS=Klebsiella aerogenes OX=548 GN=cyoA PE=3 SV=1	A0A0F1LA05,A0A0H3FSP7	EAE_12730,cyoA	uniprot-Klebsiella aerogenes.fasta	34774.6	1	6	16	80	0.0002	0.204	possibly correct	TRUE	controllerType=0 controllerNumber=1 scan=57388	R	A	0.986	30.5	27.7	20.1	2		n-term: TMT6plex (+229.16), k9: TMT6plex (+229.16)	508.629	1522.87	1523.86	3	0.01035	6.791	3798.48	80900000	229	237	TRUE
	ATFDQWVAk	Ubiquinol oxidase subunit 2 OS=Klebsiella aerogenes OX=548 GN=cyoA PE=3 SV=1	A0A0F1LA05,A0A0H3FSP7	EAE_12730,cyoA	uniprot-Klebsiella aerogenes.fasta	34774.6	1	6	16	80	0.0002	0.204	possibly correct	TRUE	controllerType=0 controllerNumber=1 scan=58688	R	A	0.987	36	32.8	21.6	2		n-term: TMT6plex (+229.16), k9: TMT6plex (+229.16)	762.44	1522.87	1523.86	2	0.01078	7.076	3731.28	256000000	229	237	TRUE
	ATFDQWVAk	Ubiquinol oxidase subunit 2 OS=Klebsiella aerogenes OX=548 GN=cyoA PE=3 SV=1	A0A0F1LA05,A0A0H3FSP7	EAE_12730,cyoA	uniprot-Klebsiella aerogenes.fasta	34774.6	1	6	16	80	0.0002	0.204	possibly correct	TRUE	controllerType=0 controllerNumber=1 scan=57452	R	A	0.995	41	32.8	27.6	2		n-term: TMT6plex (+229.16), k9: TMT6plex (+229.16)	762.441	1522.87	1523.86	2	0.01152	7.557	3802.02	658000000	229	237	TRUE
	ATFDQWVAk	Ubiquinol oxidase subunit 2 OS=Klebsiella aerogenes OX=548 GN=cyoA PE=3 SV=1	A0A0F1LA05,A0A0H3FSP7	EAE_12730,cyoA	uniprot-Klebsiella aerogenes.fasta	34774.6	1	6	16	80	0.0002	0.204	possibly correct	TRUE	controllerType=0 controllerNumber=1 scan=56569	R	A	0.997	40.3	27.8	24.4	2		n-term: TMT6plex (+229.16), k9: TMT6plex (+229.16)	762.44	1522.87	1523.86	2	0.01101	7.225	3751.35	513000000	229	237	TRUE
	ATFDQWVAk	Ubiquinol oxidase subunit 2 OS=Klebsiella aerogenes OX=548 GN=cyoA PE=3 SV=1	A0A0F1LA05,A0A0H3FSP7	EAE_12730,cyoA	uniprot-Klebsiella aerogenes.fasta	34774.6	1	6	16	80	0.0002	0.204	possibly correct	TRUE	controllerType=0 controllerNumber=1 scan=56778	R	A	0.997	43.2	27.7	26.9	2		n-term: TMT6plex (+229.16), k9: TMT6plex (+229.16)	762.44	1522.87	1523.86	2	0.01008	6.614	3763.5	728000000	229	237	TRUE
	ATFDQWVAk	Ubiquinol oxidase subunit 2 OS=Klebsiella aerogenes OX=548 GN=cyoA PE=3 SV=1	A0A0F1LA05,A0A0H3FSP7	EAE_12730,cyoA	uniprot-Klebsiella aerogenes.fasta	34774.6	1	6	16	80	0.0002	0.204	possibly correct	TRUE	controllerType=0 controllerNumber=1 scan=54967	R	A	0.997	48.1	27.9	33.4	2		n-term: TMT6plex (+229.16), k9: TMT6plex (+229.16)	762.442	1522.87	1523.86	2	0.01401	9.191	3777.69	47800000	229	237	TRUE
	ATFDQWVAk	Ubiquinol oxidase subunit 2 OS=Klebsiella aerogenes OX=548 GN=cyoA PE=3 SV=1	A0A0F1LA05,A0A0H3FSP7	EAE_12730,cyoA	uniprot-Klebsiella aerogenes.fasta	34774.6	1	6	16	80	0.0002	0.204	possibly correct	TRUE	controllerType=0 controllerNumber=1 scan=53580	R	A	0.997	50.9	27.8	35.6	2		n-term: TMT6plex (+229.16), k9: TMT6plex (+229.16)	762.438	1522.86	1523.86	2	0.006753	4.432	3718.58	77100000	229	237	TRUE
	ATFDQWVAk	Ubiquinol oxidase subunit 2 OS=Klebsiella aerogenes OX=548 GN=cyoA PE=3 SV=1	A0A0F1LA05,A0A0H3FSP7	EAE_12730,cyoA	uniprot-Klebsiella aerogenes.fasta	34774.6	1	6	16	80	0.0002	0.204	possibly correct	TRUE	controllerType=0 controllerNumber=1 scan=57226	R	A	0.997	54.2	27.7	37.9	2		n-term: TMT6plex (+229.16), k9: TMT6plex (+229.16)	762.44	1522.87	1523.86	2	0.01008	6.612	3789.25	784000000	229	237	TRUE
	ATFDQWVAk	Ubiquinol oxidase subunit 2 OS=Klebsiella aerogenes OX=548 GN=cyoA PE=3 SV=1	A0A0F1LA05,A0A0H3FSP7	EAE_12730,cyoA	uniprot-Klebsiella aerogenes.fasta	34774.6	1	6	16	80	0.0002	0.204	possibly correct	TRUE	controllerType=0 controllerNumber=1 scan=57002	R	A	0.997	54.5	27.7	37.9	2		n-term: TMT6plex (+229.16), k9: TMT6plex (+229.16)	762.44	1522.87	1523.86	2	0.01021	6.702	3776.45	899000000	229	237	TRUE
	QSPNSmDSmAAFDk	Ubiquinol oxidase subunit 2 OS=Klebsiella aerogenes OX=548 GN=cyoA PE=3 SV=1	A0A0F1LA05,A0A0H3FSP7	EAE_12730,cyoA	uniprot-Klebsiella aerogenes.fasta	34774.6	1	6	16	80	0.0002	0.204	possibly correct	TRUE	controllerType=0 controllerNumber=1 scan=23121	K	V	0.975	28.8	28.5	28.8	2		n-term: TMT6plex (+229.16), m6: Oxidation (+15.99), m9: Oxidation (+15.99), k14: TMT6plex (+229.16)	673.661	2017.96	2018.96	3	0.0124	6.144	1972.18	61600000	240	253	TRUE
	QSPNSmDSmAAFDk	Ubiquinol oxidase subunit 2 OS=Klebsiella aerogenes OX=548 GN=cyoA PE=3 SV=1	A0A0F1LA05,A0A0H3FSP7	EAE_12730,cyoA	uniprot-Klebsiella aerogenes.fasta	34774.6	1	6	16	80	0.0002	0.204	possibly correct	TRUE	controllerType=0 controllerNumber=1 scan=23003	K	V	0.997	71.4	26.9	71.4	2		n-term: TMT6plex (+229.16), m6: Oxidation (+15.99), m9: Oxidation (+15.99), k14: TMT6plex (+229.16)	1009.99	2017.96	2018.96	2	0.01011	5.008	1966.23	38600000	240	253	TRUE
	VAVPSEnNk	Ubiquinol oxidase subunit 2 OS=Klebsiella aerogenes OX=548 GN=cyoA PE=3 SV=1	A0A0F1LA05,A0A0H3FSP7	EAE_12730,cyoA	uniprot-Klebsiella aerogenes.fasta	34774.6	1	6	16	80	0.0002	0.204	possibly correct	TRUE	controllerType=0 controllerNumber=1 scan=20333	K	V	0.966	27.7	28.9	9.42	2		n-term: TMT6plex (+229.16), n7: Deamidated (+0.98), k9: TMT6plex (+229.16)	708.913	1415.81	1416.81	2	0.007969	5.625	1969.22	50600000	254	262	TRUE
	VAVPSEnNk	Ubiquinol oxidase subunit 2 OS=Klebsiella aerogenes OX=548 GN=cyoA PE=3 SV=1	A0A0F1LA05,A0A0H3FSP7	EAE_12730,cyoA	uniprot-Klebsiella aerogenes.fasta	34774.6	1	6	16	80	0.0002	0.204	possibly correct	TRUE	controllerType=0 controllerNumber=1 scan=19813	K	V	0.984	31	28.9	7.87	2		n-term: TMT6plex (+229.16), n7: Deamidated (+0.98), k9: TMT6plex (+229.16)	708.912	1415.81	1416.81	2	0.006747	4.762	1942.33	48400000	254	262	TRUE
	VAVPSEnNk	Ubiquinol oxidase subunit 2 OS=Klebsiella aerogenes OX=548 GN=cyoA PE=3 SV=1	A0A0F1LA05,A0A0H3FSP7	EAE_12730,cyoA	uniprot-Klebsiella aerogenes.fasta	34774.6	1	6	16	80	0.0002	0.204	possibly correct	TRUE	controllerType=0 controllerNumber=1 scan=20075	K	V	0.985	31.2	28.8	2	2		n-term: TMT6plex (+229.16), n7: Deamidated (+0.98), k9: TMT6plex (+229.16)	708.915	1415.81	1416.81	2	0.01223	8.63	1955.97	57100000	254	262	TRUE
	VAVPSENNk	Ubiquinol oxidase subunit 2 OS=Klebsiella aerogenes OX=548 GN=cyoA PE=3 SV=1	A0A0F1LA05,A0A0H3FSP7	EAE_12730,cyoA	uniprot-Klebsiella aerogenes.fasta	34774.6	1	6	16	80	0.0002	0.204	possibly correct	TRUE	controllerType=0 controllerNumber=1 scan=21365	K	V	0.992	36.9	31.6	33.9	2		n-term: TMT6plex (+229.16), k9: TMT6plex (+229.16)	708.421	1414.83	1415.83	2	0.008341	5.891	1953.52	93800000	254	262	TRUE
	VAVPSENNk	Ubiquinol oxidase subunit 2 OS=Klebsiella aerogenes OX=548 GN=cyoA PE=3 SV=1	A0A0F1LA05,A0A0H3FSP7	EAE_12730,cyoA	uniprot-Klebsiella aerogenes.fasta	34774.6	1	6	16	80	0.0002	0.204	possibly correct	TRUE	controllerType=0 controllerNumber=1 scan=22322	K	V	0.992	34	28.2	31.9	2		n-term: TMT6plex (+229.16), k9: TMT6plex (+229.16)	708.42	1414.83	1415.83	2	0.006691	4.726	1865.1	48600000	254	262	TRUE
	VAVPSENNk	Ubiquinol oxidase subunit 2 OS=Klebsiella aerogenes OX=548 GN=cyoA PE=3 SV=1	A0A0F1LA05,A0A0H3FSP7	EAE_12730,cyoA	uniprot-Klebsiella aerogenes.fasta	34774.6	1	6	16	80	0.0002	0.204	possibly correct	TRUE	controllerType=0 controllerNumber=1 scan=20645	K	V	0.995	35.6	28.2	31	2		n-term: TMT6plex (+229.16), k9: TMT6plex (+229.16)	708.421	1414.83	1415.83	2	0.007995	5.647	1915.74	315000000	254	262	TRUE
	VAVPSENNk	Ubiquinol oxidase subunit 2 OS=Klebsiella aerogenes OX=548 GN=cyoA PE=3 SV=1	A0A0F1LA05,A0A0H3FSP7	EAE_12730,cyoA	uniprot-Klebsiella aerogenes.fasta	34774.6	1	6	16	80	0.0002	0.204	possibly correct	TRUE	controllerType=0 controllerNumber=1 scan=21124	K	V	0.995	35.6	28.2	31.7	2		n-term: TMT6plex (+229.16), k9: TMT6plex (+229.16)	708.421	1414.83	1415.83	2	0.007919	5.593	1940.97	215000000	254	262	TRUE
	VAVPSENNk	Ubiquinol oxidase subunit 2 OS=Klebsiella aerogenes OX=548 GN=cyoA PE=3 SV=1	A0A0F1LA05,A0A0H3FSP7	EAE_12730,cyoA	uniprot-Klebsiella aerogenes.fasta	34774.6	1	6	16	80	0.0002	0.204	possibly correct	TRUE	controllerType=0 controllerNumber=1 scan=7000	K	V	0.995	36	27.5	36	2		k9: TMT6plex (+229.16)	593.839	1185.66	1186.66	2	0.007091	5.975	1139.49	1978290	254	262	TRUE
	VAVPSENNk	Ubiquinol oxidase subunit 2 OS=Klebsiella aerogenes OX=548 GN=cyoA PE=3 SV=1	A0A0F1LA05,A0A0H3FSP7	EAE_12730,cyoA	uniprot-Klebsiella aerogenes.fasta	34774.6	1	6	16	80	0.0002	0.204	possibly correct	TRUE	controllerType=0 controllerNumber=1 scan=21609	K	V	0.996	40.7	31.6	37	2		n-term: TMT6plex (+229.16), k9: TMT6plex (+229.16)	708.42	1414.83	1415.83	2	0.007853	5.547	1966.18	39500000	254	262	TRUE
	VAVPSENNk	Ubiquinol oxidase subunit 2 OS=Klebsiella aerogenes OX=548 GN=cyoA PE=3 SV=1	A0A0F1LA05,A0A0H3FSP7	EAE_12730,cyoA	uniprot-Klebsiella aerogenes.fasta	34774.6	1	6	16	80	0.0002	0.204	possibly correct	TRUE	controllerType=0 controllerNumber=1 scan=20412	K	V	0.997	39.5	27.9	37.9	2		n-term: TMT6plex (+229.16), k9: TMT6plex (+229.16)	708.421	1414.83	1415.83	2	0.009319	6.582	1903.2	37600000	254	262	TRUE
	VAVPSENNk	Ubiquinol oxidase subunit 2 OS=Klebsiella aerogenes OX=548 GN=cyoA PE=3 SV=1	A0A0F1LA05,A0A0H3FSP7	EAE_12730,cyoA	uniprot-Klebsiella aerogenes.fasta	34774.6	1	6	16	80	0.0002	0.204	possibly correct	TRUE	controllerType=0 controllerNumber=1 scan=7151	K	V	0.997	40.3	27.5	40.3	2		k9: TMT6plex (+229.16)	593.838	1185.66	1186.66	2	0.005803	4.89	1151.67	2791260	254	262	TRUE
	VAVPSENNk	Ubiquinol oxidase subunit 2 OS=Klebsiella aerogenes OX=548 GN=cyoA PE=3 SV=1	A0A0F1LA05,A0A0H3FSP7	EAE_12730,cyoA	uniprot-Klebsiella aerogenes.fasta	34774.6	1	6	16	80	0.0002	0.204	possibly correct	TRUE	controllerType=0 controllerNumber=1 scan=22574	K	V	0.997	42	28.2	39.2	2		n-term: TMT6plex (+229.16), k9: TMT6plex (+229.16)	708.421	1414.83	1415.83	2	0.008213	5.801	1877.87	56000000	254	262	TRUE
	VAVPSENNk	Ubiquinol oxidase subunit 2 OS=Klebsiella aerogenes OX=548 GN=cyoA PE=3 SV=1	A0A0F1LA05,A0A0H3FSP7	EAE_12730,cyoA	uniprot-Klebsiella aerogenes.fasta	34774.6	1	6	16	80	0.0002	0.204	possibly correct	TRUE	controllerType=0 controllerNumber=1 scan=20885	K	V	0.997	43.2	28.2	39.2	2		n-term: TMT6plex (+229.16), k9: TMT6plex (+229.16)	708.42	1414.83	1415.83	2	0.007723	5.455	1928.42	421000000	254	262	TRUE
CyoB
	Peptide sequence	Protein name	Protein accession numbers	Alternate IDs	Database sources	Protein molecular weight (Da)	Protein identification probability	Exclusive unique peptide count	Exclusive unique spectrum count	Exclusive spectrum count	Percentage of total spectra	Percentage sequence coverage	Manual validation	Assigned	Spectrum name	Previous amino acid	Next amino acid	Peptide identification probability	Mascot Ion score	Mascot Identity score	Mascot Delta Ion Score	Number of enzymatic termini	Fixed modifications identified by spectrum	Variable modifications identified by spectrum	Observed m/z	Actual peptide mass (AMU)	Calculated +1H Peptide Mass (AMU)	Spectrum charge	Actual minus calculated peptide mass (AMU)	Actual minus calculated peptide mass (PPM)	Retention Time (sec)	Total Ion Current	Peptide start index	Peptide stop index	Exclusive	Other Proteins
	APGMTMFk	Cytochrome bo(3) ubiquinol oxidase subunit 1 OS=Klebsiella aerogenes OX=548 GN=cyoB PE=3 SV=1	A0A447LCJ9	cyoB	uniprot-Klebsiella aerogenes.fasta	67569.6	1	7	10	33	0.0001	0.156	possibly correct	TRUE	controllerType=0 controllerNumber=1 scan=50175	R	M	0.99	33.5	27.8	33.3	2		n-term: TMT6plex (+229.16), k8: TMT6plex (+229.16)	670.881	1339.75	1340.75	2	0.007013	5.231	3273.43	206000000	158	165	TRUE
	AFGFTLNETWGk	Cytochrome bo(3) ubiquinol oxidase subunit 1 OS=Klebsiella aerogenes OX=548 GN=cyoB PE=3 SV=1	A0A447LCJ9	cyoB	uniprot-Klebsiella aerogenes.fasta	67569.6	1	7	10	33	0.0001	0.156	possibly correct	TRUE	controllerType=0 controllerNumber=1 scan=74197	K	R	0.997	58.5	32.5	58	2		n-term: TMT6plex (+229.16), k12: TMT6plex (+229.16)	915.009	1828	1829	2	0.009901	5.414	4953.98	28000000	384	395	TRUE
	DLTGDPWGGR	Cytochrome bo(3) ubiquinol oxidase subunit 1 OS=Klebsiella aerogenes OX=548 GN=cyoB PE=3 SV=1	A0A447LCJ9	cyoB	uniprot-Klebsiella aerogenes.fasta	67569.6	1	7	10	33	0.0001	0.156	possibly correct	TRUE	controllerType=0 controllerNumber=1 scan=36143	R	T	0.989	31.3	27.3	25.7	2		n-term: TMT6plex (+229.16)	651.839	1301.66	1302.66	2	0.006911	5.305	2795.54	93900000	469	478	TRUE
	DLTGDPWGGR	Cytochrome bo(3) ubiquinol oxidase subunit 1 OS=Klebsiella aerogenes OX=548 GN=cyoB PE=3 SV=1	A0A447LCJ9	cyoB	uniprot-Klebsiella aerogenes.fasta	67569.6	1	7	10	33	0.0001	0.156	possibly correct	TRUE	controllerType=0 controllerNumber=1 scan=36633	R	T	0.992	32.4	26.9	25.1	2		n-term: TMT6plex (+229.16)	651.838	1301.66	1302.66	2	0.004819	3.699	2807.87	184000000	469	478	TRUE
	DLTGDPWGGR	Cytochrome bo(3) ubiquinol oxidase subunit 1 OS=Klebsiella aerogenes OX=548 GN=cyoB PE=3 SV=1	A0A447LCJ9	cyoB	uniprot-Klebsiella aerogenes.fasta	67569.6	1	7	10	33	0.0001	0.156	possibly correct	TRUE	controllerType=0 controllerNumber=1 scan=35159	R	T	0.992	32.9	27.2	23.8	2		n-term: TMT6plex (+229.16)	651.839	1301.66	1302.66	2	0.006495	4.986	2732.94	1930000000	469	478	TRUE
	DLTGDPWGGR	Cytochrome bo(3) ubiquinol oxidase subunit 1 OS=Klebsiella aerogenes OX=548 GN=cyoB PE=3 SV=1	A0A447LCJ9	cyoB	uniprot-Klebsiella aerogenes.fasta	67569.6	1	7	10	33	0.0001	0.156	possibly correct	TRUE	controllerType=0 controllerNumber=1 scan=35399	R	T	0.994	34.5	27.2	25.8	2		n-term: TMT6plex (+229.16)	651.839	1301.66	1302.66	2	0.006643	5.099	2745.4	2970000000	469	478	TRUE
	DLTGDPWGGR	Cytochrome bo(3) ubiquinol oxidase subunit 1 OS=Klebsiella aerogenes OX=548 GN=cyoB PE=3 SV=1	A0A447LCJ9	cyoB	uniprot-Klebsiella aerogenes.fasta	67569.6	1	7	10	33	0.0001	0.156	possibly correct	TRUE	controllerType=0 controllerNumber=1 scan=35895	R	T	0.995	34.8	27.2	21.9	2		n-term: TMT6plex (+229.16)	651.839	1301.66	1302.66	2	0.007397	5.678	2770.68	2200000000	469	478	TRUE
	DLTGDPWGGR	Cytochrome bo(3) ubiquinol oxidase subunit 1 OS=Klebsiella aerogenes OX=548 GN=cyoB PE=3 SV=1	A0A447LCJ9	cyoB	uniprot-Klebsiella aerogenes.fasta	67569.6	1	7	10	33	0.0001	0.156	possibly correct	TRUE	controllerType=0 controllerNumber=1 scan=36376	R	T	0.995	34.9	27.2	31.2	2		n-term: TMT6plex (+229.16)	651.839	1301.66	1302.66	2	0.007269	5.58	2795.09	334000000	469	478	TRUE
	DLTGDPWGGR	Cytochrome bo(3) ubiquinol oxidase subunit 1 OS=Klebsiella aerogenes OX=548 GN=cyoB PE=3 SV=1	A0A447LCJ9	cyoB	uniprot-Klebsiella aerogenes.fasta	67569.6	1	7	10	33	0.0001	0.156	possibly correct	TRUE	controllerType=0 controllerNumber=1 scan=35639	R	T	0.996	36	27.2	32.1	2		n-term: TMT6plex (+229.16)	651.839	1301.66	1302.66	2	0.007047	5.409	2757.8	2410000000	469	478	TRUE
	DLTGDPWGGR	Cytochrome bo(3) ubiquinol oxidase subunit 1 OS=Klebsiella aerogenes OX=548 GN=cyoB PE=3 SV=1	A0A447LCJ9	cyoB	uniprot-Klebsiella aerogenes.fasta	67569.6	1	7	10	33	0.0001	0.156	possibly correct	TRUE	controllerType=0 controllerNumber=1 scan=36135	R	T	0.997	37.6	27.2	32	2		n-term: TMT6plex (+229.16)	651.84	1301.66	1302.66	2	0.007753	5.951	2782.93	619000000	469	478	TRUE
	TLEWATSSPPPFYNFAVVPNVHER	Cytochrome bo(3) ubiquinol oxidase subunit 1 OS=Klebsiella aerogenes OX=548 GN=cyoB PE=3 SV=1	A0A447LCJ9	cyoB	uniprot-Klebsiella aerogenes.fasta	67569.6	1	7	10	33	0.0001	0.156	possibly correct	TRUE	controllerType=0 controllerNumber=1 scan=77953	R	D	0.969	31.7	32.4	31.1	2		n-term: TMT6plex (+229.16)	747.643	2986.54	2987.53	4	0.0232	7.767	5198.73	32500000	479	502	TRUE
	TLEWATSSPPPFYNFAVVPNVHER	Cytochrome bo(3) ubiquinol oxidase subunit 1 OS=Klebsiella aerogenes OX=548 GN=cyoB PE=3 SV=1	A0A447LCJ9	cyoB	uniprot-Klebsiella aerogenes.fasta	67569.6	1	7	10	33	0.0001	0.156	possibly correct	TRUE	controllerType=0 controllerNumber=1 scan=78148	R	D	0.97	31.9	32.5	31.2	2		n-term: TMT6plex (+229.16)	747.643	2986.54	2987.53	4	0.02491	8.339	5211.67	44000000	479	502	TRUE
	TLEWATSSPPPFYNFAVVPNVHER	Cytochrome bo(3) ubiquinol oxidase subunit 1 OS=Klebsiella aerogenes OX=548 GN=cyoB PE=3 SV=1	A0A447LCJ9	cyoB	uniprot-Klebsiella aerogenes.fasta	67569.6	1	7	10	33	0.0001	0.156	possibly correct	TRUE	controllerType=0 controllerNumber=1 scan=83400	R	D	0.985	35	32.4	34.5	2		n-term: TMT6plex (+229.16)	747.639	2986.53	2987.53	4	0.008069	2.701	5186.41	49900000	479	502	TRUE
	TLEWATSSPPPFYNFAVVPNVHER	Cytochrome bo(3) ubiquinol oxidase subunit 1 OS=Klebsiella aerogenes OX=548 GN=cyoB PE=3 SV=1	A0A447LCJ9	cyoB	uniprot-Klebsiella aerogenes.fasta	67569.6	1	7	10	33	0.0001	0.156	possibly correct	TRUE	controllerType=0 controllerNumber=1 scan=78431	R	D	0.99	36.7	32.4	36.4	2		n-term: TMT6plex (+229.16)	747.641	2986.54	2987.53	4	0.01808	6.051	5230.02	17600000	479	502	TRUE
	TLEWATSSPPPFYNFAVVPNVHER	Cytochrome bo(3) ubiquinol oxidase subunit 1 OS=Klebsiella aerogenes OX=548 GN=cyoB PE=3 SV=1	A0A447LCJ9	cyoB	uniprot-Klebsiella aerogenes.fasta	67569.6	1	7	10	33	0.0001	0.156	possibly correct	TRUE	controllerType=0 controllerNumber=1 scan=84020	R	D	0.991	37.3	32.3	36.5	2		n-term: TMT6plex (+229.16)	747.639	2986.53	2987.53	4	0.01051	3.518	5225.38	51600000	479	502	TRUE
	TLEWATSSPPPFYNFAVVPNVHER	Cytochrome bo(3) ubiquinol oxidase subunit 1 OS=Klebsiella aerogenes OX=548 GN=cyoB PE=3 SV=1	A0A447LCJ9	cyoB	uniprot-Klebsiella aerogenes.fasta	67569.6	1	7	10	33	0.0001	0.156	possibly correct	TRUE	controllerType=0 controllerNumber=1 scan=83598	R	D	0.994	39.5	32.4	35.2	2		n-term: TMT6plex (+229.16)	747.641	2986.54	2987.53	4	0.0171	5.724	5198.89	119000000	479	502	TRUE
	TLEWATSSPPPFYNFAVVPNVHER	Cytochrome bo(3) ubiquinol oxidase subunit 1 OS=Klebsiella aerogenes OX=548 GN=cyoB PE=3 SV=1	A0A447LCJ9	cyoB	uniprot-Klebsiella aerogenes.fasta	67569.6	1	7	10	33	0.0001	0.156	possibly correct	TRUE	controllerType=0 controllerNumber=1 scan=83901	R	D	0.997	46.4	32.3	46.4	2		n-term: TMT6plex (+229.16)	996.518	2986.53	2987.53	3	0.01429	4.784	5217.94	120000000	479	502	TRUE
	TLEWATSSPPPFYNFAVVPNVHER	Cytochrome bo(3) ubiquinol oxidase subunit 1 OS=Klebsiella aerogenes OX=548 GN=cyoB PE=3 SV=1	A0A447LCJ9	cyoB	uniprot-Klebsiella aerogenes.fasta	67569.6	1	7	10	33	0.0001	0.156	possibly correct	TRUE	controllerType=0 controllerNumber=1 scan=83806	R	D	0.997	47.5	32.4	43.4	2		n-term: TMT6plex (+229.16)	747.642	2986.54	2987.53	4	0.01906	6.379	5211.97	119000000	479	502	TRUE
	QPAHYEEIHMPk	Cytochrome bo(3) ubiquinol oxidase subunit 1 OS=Klebsiella aerogenes OX=548 GN=cyoB PE=3 SV=1	A0A447LCJ9	cyoB	uniprot-Klebsiella aerogenes.fasta	67569.6	1	7	10	33	0.0001	0.156	possibly correct	TRUE	controllerType=0 controllerNumber=1 scan=25069	K	N	0.987	32.7	29.5	32.7	2		n-term: TMT6plex (+229.16), k12: TMT6plex (+229.16)	646.686	1937.04	1938.03	3	0.01227	6.333	2217.59	47100000	517	528	TRUE
	SFDEDVDYYVPVAEVEk	Cytochrome bo(3) ubiquinol oxidase subunit 1 OS=Klebsiella aerogenes OX=548 GN=cyoB PE=3 SV=1	A0A447LCJ9	cyoB	uniprot-Klebsiella aerogenes.fasta	67569.6	1	7	10	33	0.0001	0.156	possibly correct	TRUE	controllerType=0 controllerNumber=1 scan=67590	K	L	0.966	34.4	35.5	29.3	2		n-term: TMT6plex (+229.16), k17: TMT6plex (+229.16)	821.423	2461.25	2462.24	3	0.01544	6.27	4586.42	35000000	570	586	TRUE
	SFDEDVDYYVPVAEVEk	Cytochrome bo(3) ubiquinol oxidase subunit 1 OS=Klebsiella aerogenes OX=548 GN=cyoB PE=3 SV=1	A0A447LCJ9	cyoB	uniprot-Klebsiella aerogenes.fasta	67569.6	1	7	10	33	0.0001	0.156	possibly correct	TRUE	controllerType=0 controllerNumber=1 scan=67749	K	L	0.997	75.4	31.5	56.3	2		n-term: TMT6plex (+229.16), k17: TMT6plex (+229.16)	1231.63	2461.25	2462.24	2	0.01521	6.177	4595.95	33300000	570	586	TRUE
	SFDEDVDYYVPVAEVEk	Cytochrome bo(3) ubiquinol oxidase subunit 1 OS=Klebsiella aerogenes OX=548 GN=cyoB PE=3 SV=1	A0A447LCJ9	cyoB	uniprot-Klebsiella aerogenes.fasta	67569.6	1	7	10	33	0.0001	0.156	possibly correct	TRUE	controllerType=0 controllerNumber=1 scan=67973	K	L	0.997	77.4	31.1	59.4	2		n-term: TMT6plex (+229.16), k17: TMT6plex (+229.16)	1231.63	2461.24	2462.24	2	0.006175	2.508	4609.93	51700000	570	586	TRUE
	LENQHFDEINk	Cytochrome bo(3) ubiquinol oxidase subunit 1 OS=Klebsiella aerogenes OX=548 GN=cyoB PE=3 SV=1	A0A447LCJ9	cyoB	uniprot-Klebsiella aerogenes.fasta	67569.6	1	7	10	33	0.0001	0.156	possibly correct	TRUE	controllerType=0 controllerNumber=1 scan=32498	K	A	0.976	30.5	30.1	30.5	2		n-term: TMT6plex (+229.16), k11: TMT6plex (+229.16)	615.671	1843.99	1844.99	3	0.006963	3.774	2597.55	128000000	587	597	TRUE
	LENQHFDEINk	Cytochrome bo(3) ubiquinol oxidase subunit 1 OS=Klebsiella aerogenes OX=548 GN=cyoB PE=3 SV=1	A0A447LCJ9	cyoB	uniprot-Klebsiella aerogenes.fasta	67569.6	1	7	10	33	0.0001	0.156	possibly correct	TRUE	controllerType=0 controllerNumber=1 scan=32777	K	A	0.979	30.9	30	30.9	2		n-term: TMT6plex (+229.16), k11: TMT6plex (+229.16)	615.672	1843.99	1844.99	3	0.009642	5.226	2622.29	2410000000	587	597	TRUE
	LENQHFDEINk	Cytochrome bo(3) ubiquinol oxidase subunit 1 OS=Klebsiella aerogenes OX=548 GN=cyoB PE=3 SV=1	A0A447LCJ9	cyoB	uniprot-Klebsiella aerogenes.fasta	67569.6	1	7	10	33	0.0001	0.156	possibly correct	TRUE	controllerType=0 controllerNumber=1 scan=33017	K	A	0.981	31.5	30.1	31.5	2		n-term: TMT6plex (+229.16), k11: TMT6plex (+229.16)	615.671	1843.99	1844.99	3	0.008781	4.76	2634.37	1010000000	587	597	TRUE
	LENQHFDEINk	Cytochrome bo(3) ubiquinol oxidase subunit 1 OS=Klebsiella aerogenes OX=548 GN=cyoB PE=3 SV=1	A0A447LCJ9	cyoB	uniprot-Klebsiella aerogenes.fasta	67569.6	1	7	10	33	0.0001	0.156	possibly correct	TRUE	controllerType=0 controllerNumber=1 scan=32239	K	A	0.982	31.7	30.1	31.7	2		n-term: TMT6plex (+229.16), k11: TMT6plex (+229.16)	615.671	1843.99	1844.99	3	0.007881	4.272	2584.39	162000000	587	597	TRUE
	LENQHFDEINk	Cytochrome bo(3) ubiquinol oxidase subunit 1 OS=Klebsiella aerogenes OX=548 GN=cyoB PE=3 SV=1	A0A447LCJ9	cyoB	uniprot-Klebsiella aerogenes.fasta	67569.6	1	7	10	33	0.0001	0.156	possibly correct	TRUE	controllerType=0 controllerNumber=1 scan=32299	K	A	0.986	32.7	30	32.7	2		n-term: TMT6plex (+229.16), k11: TMT6plex (+229.16)	615.672	1843.99	1844.99	3	0.009795	5.309	2596.78	461000000	587	597	TRUE
	LENQHFDEINk	Cytochrome bo(3) ubiquinol oxidase subunit 1 OS=Klebsiella aerogenes OX=548 GN=cyoB PE=3 SV=1	A0A447LCJ9	cyoB	uniprot-Klebsiella aerogenes.fasta	67569.6	1	7	10	33	0.0001	0.156	possibly correct	TRUE	controllerType=0 controllerNumber=1 scan=35422	K	A	0.989	34	30.1	34	2		n-term: TMT6plex (+229.16), k11: TMT6plex (+229.16)	615.672	1843.99	1844.99	3	0.009183	4.977	2519.86	221000000	587	597	TRUE
	LENQHFDEINk	Cytochrome bo(3) ubiquinol oxidase subunit 1 OS=Klebsiella aerogenes OX=548 GN=cyoB PE=3 SV=1	A0A447LCJ9	cyoB	uniprot-Klebsiella aerogenes.fasta	67569.6	1	7	10	33	0.0001	0.156	possibly correct	TRUE	controllerType=0 controllerNumber=1 scan=35168	K	A	0.996	39.4	30	39.3	2		n-term: TMT6plex (+229.16), k11: TMT6plex (+229.16)	615.672	1843.99	1844.99	3	0.009345	5.065	2507	261000000	587	597	TRUE
	LENQHFDEINk	Cytochrome bo(3) ubiquinol oxidase subunit 1 OS=Klebsiella aerogenes OX=548 GN=cyoB PE=3 SV=1	A0A447LCJ9	cyoB	uniprot-Klebsiella aerogenes.fasta	67569.6	1	7	10	33	0.0001	0.156	possibly correct	TRUE	controllerType=0 controllerNumber=1 scan=32537	K	A	0.997	40.2	30	40.2	2		n-term: TMT6plex (+229.16), k11: TMT6plex (+229.16)	615.671	1843.99	1844.99	3	0.008682	4.706	2609.7	2020000000	587	597	TRUE
	LENQHFDEINk	Cytochrome bo(3) ubiquinol oxidase subunit 1 OS=Klebsiella aerogenes OX=548 GN=cyoB PE=3 SV=1	A0A447LCJ9	cyoB	uniprot-Klebsiella aerogenes.fasta	67569.6	1	7	10	33	0.0001	0.156	possibly correct	TRUE	controllerType=0 controllerNumber=1 scan=32385	K	A	0.997	56.4	33.2	49	2		n-term: TMT6plex (+229.16), k11: TMT6plex (+229.16)	923.002	1843.99	1844.99	2	0.005085	2.756	2601.39	67900000	587	597	TRUE
	LENQHFDEINk	Cytochrome bo(3) ubiquinol oxidase subunit 1 OS=Klebsiella aerogenes OX=548 GN=cyoB PE=3 SV=1	A0A447LCJ9	cyoB	uniprot-Klebsiella aerogenes.fasta	67569.6	1	7	10	33	0.0001	0.156	possibly correct	TRUE	controllerType=0 controllerNumber=1 scan=32905	K	A	0.997	59.7	30.1	52.2	2		n-term: TMT6plex (+229.16), k11: TMT6plex (+229.16)	923.002	1843.99	1844.99	2	0.006739	3.653	2628.59	204000000	587	597	TRUE
	LENQHFDEINk	Cytochrome bo(3) ubiquinol oxidase subunit 1 OS=Klebsiella aerogenes OX=548 GN=cyoB PE=3 SV=1	A0A447LCJ9	cyoB	uniprot-Klebsiella aerogenes.fasta	67569.6	1	7	10	33	0.0001	0.156	possibly correct	TRUE	controllerType=0 controllerNumber=1 scan=32665	K	A	0.997	61.1	30	54.1	2		n-term: TMT6plex (+229.16), k11: TMT6plex (+229.16)	923.004	1843.99	1844.99	2	0.009637	5.223	2616.34	194000000	587	597	TRUE
NDH2-D2-1
	Peptide sequence	Protein name	Protein accession numbers	Alternate IDs	Database sources	Protein molecular weight (Da)	Protein identification probability	Exclusive unique peptide count	Exclusive unique spectrum count	Exclusive spectrum count	Percentage of total spectra	Percentage sequence coverage	Manual validation	Assigned	Spectrum name	Previous amino acid	Next amino acid	Peptide identification probability	Mascot Ion score	Mascot Identity score	Mascot Delta Ion Score	Number of enzymatic termini	Fixed modifications identified by spectrum	Variable modifications identified by spectrum	Observed m/z	Actual peptide mass (AMU)	Calculated +1H Peptide Mass (AMU)	Spectrum charge	Actual minus calculated peptide mass (AMU)	Actual minus calculated peptide mass (PPM)	Retention Time (sec)	Total Ion Current	Peptide start index	Peptide stop index	Exclusive	Other Proteins
	IVIVGGGAGGLELATQLGR	NADH dehydrogenase OS=Klebsiella aerogenes OX=548 GN=YA35_24205 PE=4 SV=1	A0A094XHE6,A0A0H3FZ94	EAE_16455,YA35_24205	uniprot-Klebsiella aerogenes.fasta	47372.1	1	9	11	31	0.0001	0.281	possibly correct	TRUE	controllerType=0 controllerNumber=1 scan=74425	R	K	0.997	61	25.3	61	2		n-term: TMT6plex (+229.16)	1005.61	2009.2	2010.19	2	0.01628	8.1	4968.78	31800000	8	26	TRUE
	IVIVGGGAGGLELATQLGR	NADH dehydrogenase OS=Klebsiella aerogenes OX=548 GN=YA35_24205 PE=4 SV=1	A0A094XHE6,A0A0H3FZ95	EAE_16455,YA35_24205	uniprot-Klebsiella aerogenes.fasta	47372.1	1	9	11	31	0.0001	0.281	possibly correct	TRUE	controllerType=0 controllerNumber=1 scan=74223	R	K	0.997	68.6	25.1	68.6	2		n-term: TMT6plex (+229.16)	1005.61	2009.2	2010.19	2	0.01897	9.439	4955.75	25900000	8	26	TRUE
	IVIVGGGAGGLELATQLGR	NADH dehydrogenase OS=Klebsiella aerogenes OX=548 GN=YA35_24205 PE=4 SV=1	A0A094XHE6,A0A0H3FZ96	EAE_16455,YA35_24205	uniprot-Klebsiella aerogenes.fasta	47372.1	1	9	11	31	0.0001	0.281	possibly correct	TRUE	controllerType=0 controllerNumber=1 scan=75057	R	K	0.997	70.6	25.6	70.6	2		n-term: TMT6plex (+229.16)	1005.61	2009.2	2010.19	2	0.01397	6.949	5009.04	22800000	8	26	TRUE
	IVIVGGGAGGLELATQLGR	NADH dehydrogenase OS=Klebsiella aerogenes OX=548 GN=YA35_24205 PE=4 SV=1	A0A094XHE6,A0A0H3FZ97	EAE_16455,YA35_24205	uniprot-Klebsiella aerogenes.fasta	47372.1	1	9	11	31	0.0001	0.281	possibly correct	TRUE	controllerType=0 controllerNumber=1 scan=74752	R	K	0.997	70.7	25.3	70.7	2		n-term: TMT6plex (+229.16)	1005.61	2009.2	2010.19	2	0.01653	8.224	4989.56	23100000	8	26	TRUE
	IVIVGGGAGGLELATQLGR	NADH dehydrogenase OS=Klebsiella aerogenes OX=548 GN=YA35_24205 PE=4 SV=1	A0A094XHE6,A0A0H3FZ98	EAE_16455,YA35_24205	uniprot-Klebsiella aerogenes.fasta	47372.1	1	9	11	31	0.0001	0.281	possibly correct	TRUE	controllerType=0 controllerNumber=1 scan=75097	R	K	0.997	74.1	25.3	74.1	2		n-term: TMT6plex (+229.16)	670.74	2009.2	2010.19	3	0.01504	7.481	5011.65	51000000	8	26	TRUE
	IVIVGGGAGGLELATQLGR	NADH dehydrogenase OS=Klebsiella aerogenes OX=548 GN=YA35_24205 PE=4 SV=1	A0A094XHE6,A0A0H3FZ99	EAE_16455,YA35_24205	uniprot-Klebsiella aerogenes.fasta	47372.1	1	9	11	31	0.0001	0.281	possibly correct	TRUE	controllerType=0 controllerNumber=1 scan=74901	R	K	0.997	78.9	25.6	77.4	2		n-term: TMT6plex (+229.16)	670.74	2009.2	2010.19	3	0.01469	7.307	4999.13	46300000	8	26	TRUE
	GELLVAER	NADH dehydrogenase OS=Klebsiella aerogenes OX=548 GN=YA35_24205 PE=4 SV=1	A0A094XHE6,A0A0H3FZ94	EAE_16455,YA35_24205	uniprot-Klebsiella aerogenes.fasta	47372.1	1	9	11	31	0.0001	0.281	possibly correct	TRUE	controllerType=0 controllerNumber=1 scan=28150	K	K	0.988	32.3	28.7	24.6	2		n-term: TMT6plex (+229.16)	558.337	1114.66	1115.66	2	0.005127	4.595	2314.1	89900000	104	111	TRUE
	ENcIFLDNPHQAR	NADH dehydrogenase OS=Klebsiella aerogenes OX=548 GN=YA35_24205 PE=4 SV=1	A0A094XHE6,A0A0H3FZ94	EAE_16455,YA35_24205	uniprot-Klebsiella aerogenes.fasta	47372.1	1	9	11	31	0.0001	0.281	possibly correct	TRUE	controllerType=0 controllerNumber=1 scan=27599	K	R	0.981	30	28.7	30	2	c3: Carbamidomethyl (+57.02)	n-term: TMT6plex (+229.16)	614.978	1841.91	1842.91	3	0.007413	4.022	2351.8	125000000	136	148	TRUE
	ENcIFLDNPHQAR	NADH dehydrogenase OS=Klebsiella aerogenes OX=548 GN=YA35_24205 PE=4 SV=1	A0A094XHE6,A0A0H3FZ94	EAE_16455,YA35_24205	uniprot-Klebsiella aerogenes.fasta	47372.1	1	9	11	31	0.0001	0.281	possibly correct	TRUE	controllerType=0 controllerNumber=1 scan=27345	K	R	0.983	30.6	28.6	30.6	2	c3: Carbamidomethyl (+57.02)	n-term: TMT6plex (+229.16)	614.978	1841.91	1842.91	3	0.006315	3.427	2338.57	195000000	136	148	TRUE
	YSANLGAnGk	NADH dehydrogenase OS=Klebsiella aerogenes OX=548 GN=YA35_24205 PE=4 SV=1	A0A094XHE6,A0A0H3FZ94	EAE_16455,YA35_24205	uniprot-Klebsiella aerogenes.fasta	47372.1	1	9	11	31	0.0001	0.281	possibly correct	TRUE	controllerType=0 controllerNumber=1 scan=24030	K	V	0.997	51.6	28.6	34.9	2		n-term: TMT6plex (+229.16), n8: Deamidated (+0.98), k10: TMT6plex (+229.16)	727.41	1452.8	1453.81	2	0.007053	4.852	2095.34	30100000	161	170	TRUE
	GLTNEALNVTLVEAGER	NADH dehydrogenase OS=Klebsiella aerogenes OX=548 GN=YA35_24205 PE=4 SV=1	A0A094XHE6,A0A0H3FZ94	EAE_16455,YA35_24205	uniprot-Klebsiella aerogenes.fasta	47372.1	1	9	11	31	0.0001	0.281	possibly correct	TRUE	controllerType=0 controllerNumber=1 scan=58889	K	I	0.997	43	30.4	40.8	2		n-term: TMT6plex (+229.16)	672.374	2014.1	2015.1	3	0.009885	4.905	4024.93	102000000	203	219	TRUE
	ILPALPPR	NADH dehydrogenase OS=Klebsiella aerogenes OX=548 GN=YA35_24205 PE=4 SV=1	A0A094XHE6,A0A0H3FZ94	EAE_16455,YA35_24205	uniprot-Klebsiella aerogenes.fasta	47372.1	1	9	11	31	0.0001	0.281	possibly correct	TRUE	controllerType=0 controllerNumber=1 scan=47369	R	I	0.975	25.1	25	25.1	2		n-term: TMT6plex (+229.16)	553.371	1104.73	1105.73	2	0.005957	5.387	3395.75	208000000	220	227	TRUE
	EIGGLETNR	NADH dehydrogenase OS=Klebsiella aerogenes OX=548 GN=YA35_24205 PE=4 SV=1	A0A094XHE6,A0A0H3FZ94	EAE_16455,YA35_24205	uniprot-Klebsiella aerogenes.fasta	47372.1	1	9	11	31	0.0001	0.281	possibly correct	TRUE	controllerType=0 controllerNumber=1 scan=20843	K	I	0.993	35.5	29.2	24.2	2		n-term: TMT6plex (+229.16)	609.342	1216.67	1217.67	2	0.008401	6.899	1853.53	86800000	284	292	TRUE
	EIGGLETNR	NADH dehydrogenase OS=Klebsiella aerogenes OX=548 GN=YA35_24205 PE=4 SV=1	A0A094XHE6,A0A0H3FZ94	EAE_16455,YA35_24205	uniprot-Klebsiella aerogenes.fasta	47372.1	1	9	11	31	0.0001	0.281	possibly correct	TRUE	controllerType=0 controllerNumber=1 scan=21083	K	I	0.994	36.1	29.2	23.6	2		n-term: TMT6plex (+229.16)	609.342	1216.67	1217.67	2	0.006951	5.708	1866.09	115000000	284	292	TRUE
	EIGGLETNR	NADH dehydrogenase OS=Klebsiella aerogenes OX=548 GN=YA35_24205 PE=4 SV=1	A0A094XHE6,A0A0H3FZ94	EAE_16455,YA35_24205	uniprot-Klebsiella aerogenes.fasta	47372.1	1	9	11	31	0.0001	0.281	possibly correct	TRUE	controllerType=0 controllerNumber=1 scan=21323	K	I	0.994	36.5	29.2	23.5	2		n-term: TMT6plex (+229.16)	609.341	1216.67	1217.67	2	0.005461	4.485	1878.88	73500000	284	292	TRUE
	INQLVVEPTLQTTR	NADH dehydrogenase OS=Klebsiella aerogenes OX=548 GN=YA35_24205 PE=4 SV=1	A0A094XHE6,A0A0H3FZ94	EAE_16455,YA35_24205	uniprot-Klebsiella aerogenes.fasta	47372.1	1	9	11	31	0.0001	0.281	possibly correct	TRUE	controllerType=0 controllerNumber=1 scan=53084	R	D	0.989	31.4	27.7	31.4	2		n-term: TMT6plex (+229.16)	921.044	1840.07	1841.07	2	0.01079	5.861	3673.1	55700000	293	306	TRUE
	INQLVVEPTLQTTR	NADH dehydrogenase OS=Klebsiella aerogenes OX=548 GN=YA35_24205 PE=4 SV=1	A0A094XHE6,A0A0H3FZ94	EAE_16455,YA35_24205	uniprot-Klebsiella aerogenes.fasta	47372.1	1	9	11	31	0.0001	0.281	possibly correct	TRUE	controllerType=0 controllerNumber=1 scan=53218	R	D	0.996	39.9	31.4	34.9	2		n-term: TMT6plex (+229.16)	614.365	1840.07	1841.07	3	0.01084	5.887	3680.67	63100000	293	306	TRUE
	INQLVVEPTLQTTR	NADH dehydrogenase OS=Klebsiella aerogenes OX=548 GN=YA35_24205 PE=4 SV=1	A0A094XHE6,A0A0H3FZ94	EAE_16455,YA35_24205	uniprot-Klebsiella aerogenes.fasta	47372.1	1	9	11	31	0.0001	0.281	possibly correct	TRUE	controllerType=0 controllerNumber=1 scan=54460	R	D	0.997	38.7	27.7	38.7	2		n-term: TMT6plex (+229.16)	921.044	1840.07	1841.07	2	0.01042	5.662	3749.5	42900000	293	306	TRUE
	INQLVVEPTLQTTR	NADH dehydrogenase OS=Klebsiella aerogenes OX=548 GN=YA35_24205 PE=4 SV=1	A0A094XHE6,A0A0H3FZ94	EAE_16455,YA35_24205	uniprot-Klebsiella aerogenes.fasta	47372.1	1	9	11	31	0.0001	0.281	possibly correct	TRUE	controllerType=0 controllerNumber=1 scan=53764	R	D	0.997	39.9	27.7	39.9	2		n-term: TMT6plex (+229.16)	921.044	1840.07	1841.07	2	0.0114	6.193	3711.16	236000000	293	306	TRUE
	INQLVVEPTLQTTR	NADH dehydrogenase OS=Klebsiella aerogenes OX=548 GN=YA35_24205 PE=4 SV=1	A0A094XHE6,A0A0H3FZ94	EAE_16455,YA35_24205	uniprot-Klebsiella aerogenes.fasta	47372.1	1	9	11	31	0.0001	0.281	possibly correct	TRUE	controllerType=0 controllerNumber=1 scan=52650	R	D	0.997	40.2	27.6	40.2	2		n-term: TMT6plex (+229.16)	614.365	1840.07	1841.07	3	0.01186	6.443	3667.74	49500000	293	306	TRUE
	INQLVVEPTLQTTR	NADH dehydrogenase OS=Klebsiella aerogenes OX=548 GN=YA35_24205 PE=4 SV=1	A0A094XHE6,A0A0H3FZ94	EAE_16455,YA35_24205	uniprot-Klebsiella aerogenes.fasta	47372.1	1	9	11	31	0.0001	0.281	possibly correct	TRUE	controllerType=0 controllerNumber=1 scan=53540	R	D	0.997	41.3	27.7	41.3	2		n-term: TMT6plex (+229.16)	921.044	1840.07	1841.07	2	0.01088	5.908	3698.59	226000000	293	306	TRUE
	INQLVVEPTLQTTR	NADH dehydrogenase OS=Klebsiella aerogenes OX=548 GN=YA35_24205 PE=4 SV=1	A0A094XHE6,A0A0H3FZ94	EAE_16455,YA35_24205	uniprot-Klebsiella aerogenes.fasta	47372.1	1	9	11	31	0.0001	0.281	possibly correct	TRUE	controllerType=0 controllerNumber=1 scan=53317	R	D	0.997	45.4	27.6	45.4	2		n-term: TMT6plex (+229.16)	921.044	1840.07	1841.07	2	0.01116	6.061	3686.18	94800000	293	306	TRUE
	INQLVVEPTLQTTR	NADH dehydrogenase OS=Klebsiella aerogenes OX=548 GN=YA35_24205 PE=4 SV=1	A0A094XHE6,A0A0H3FZ94	EAE_16455,YA35_24205	uniprot-Klebsiella aerogenes.fasta	47372.1	1	9	11	31	0.0001	0.281	possibly correct	TRUE	controllerType=0 controllerNumber=1 scan=54215	R	D	0.997	46.9	28	46.9	2		n-term: TMT6plex (+229.16)	921.042	1840.07	1841.07	2	0.008067	4.382	3735.83	107000000	293	306	TRUE
	INQLVVEPTLQTTR	NADH dehydrogenase OS=Klebsiella aerogenes OX=548 GN=YA35_24205 PE=4 SV=1	A0A094XHE6,A0A0H3FZ94	EAE_16455,YA35_24205	uniprot-Klebsiella aerogenes.fasta	47372.1	1	9	11	31	0.0001	0.281	possibly correct	TRUE	controllerType=0 controllerNumber=1 scan=54086	R	D	0.997	48.6	28	44	2		n-term: TMT6plex (+229.16)	614.364	1840.07	1841.07	3	0.008061	4.378	3728.76	121000000	293	306	TRUE
	INQLVVEPTLQTTR	NADH dehydrogenase OS=Klebsiella aerogenes OX=548 GN=YA35_24205 PE=4 SV=1	A0A094XHE6,A0A0H3FZ94	EAE_16455,YA35_24205	uniprot-Klebsiella aerogenes.fasta	47372.1	1	9	11	31	0.0001	0.281	possibly correct	TRUE	controllerType=0 controllerNumber=1 scan=54310	R	D	0.997	50.1	27.6	44	2		n-term: TMT6plex (+229.16)	614.366	1840.08	1841.07	3	0.01425	7.738	3741.14	66000000	293	306	TRUE
	INQLVVEPTLQTTR	NADH dehydrogenase OS=Klebsiella aerogenes OX=548 GN=YA35_24205 PE=4 SV=1	A0A094XHE6,A0A0H3FZ94	EAE_16455,YA35_24205	uniprot-Klebsiella aerogenes.fasta	47372.1	1	9	11	31	0.0001	0.281	possibly correct	TRUE	controllerType=0 controllerNumber=1 scan=53989	R	D	0.997	51.9	28	51.9	2		n-term: TMT6plex (+229.16)	921.042	1840.07	1841.07	2	0.007997	4.343	3723.42	236000000	293	306	TRUE
	INQLVVEPTLQTTR	NADH dehydrogenase OS=Klebsiella aerogenes OX=548 GN=YA35_24205 PE=4 SV=1	A0A094XHE6,A0A0H3FZ94	EAE_16455,YA35_24205	uniprot-Klebsiella aerogenes.fasta	47372.1	1	9	11	31	0.0001	0.281	possibly correct	TRUE	controllerType=0 controllerNumber=1 scan=53414	R	D	0.997	52.3	27.5	45.8	2		n-term: TMT6plex (+229.16)	614.366	1840.07	1841.07	3	0.01253	6.808	3691.52	91600000	293	306	TRUE
	INQLVVEPTLQTTR	NADH dehydrogenase OS=Klebsiella aerogenes OX=548 GN=YA35_24205 PE=4 SV=1	A0A094XHE6,A0A0H3FZ94	EAE_16455,YA35_24205	uniprot-Klebsiella aerogenes.fasta	47372.1	1	9	11	31	0.0001	0.281	possibly correct	TRUE	controllerType=0 controllerNumber=1 scan=53637	R	D	0.997	56.8	27.7	49.9	2		n-term: TMT6plex (+229.16)	614.365	1840.07	1841.07	3	0.01029	5.589	3704.15	154000000	293	306	TRUE
	INQLVVEPTLQTTR	NADH dehydrogenase OS=Klebsiella aerogenes OX=548 GN=YA35_24205 PE=4 SV=1	A0A094XHE6,A0A0H3FZ94	EAE_16455,YA35_24205	uniprot-Klebsiella aerogenes.fasta	47372.1	1	9	11	31	0.0001	0.281	possibly correct	TRUE	controllerType=0 controllerNumber=1 scan=53860	R	D	0.997	63	27.7	59.9	2		n-term: TMT6plex (+229.16)	614.365	1840.07	1841.07	3	0.01036	5.626	3716.47	161000000	293	306	TRUE
	DPDIYAIGDcAScARPEGGFVPPR	NADH dehydrogenase OS=Klebsiella aerogenes OX=548 GN=YA35_24205 PE=4 SV=1	A0A094XHE6,A0A0H3FZ94	EAE_16455,YA35_24205	uniprot-Klebsiella aerogenes.fasta	47372.1	1	9	11	31	0.0001	0.281	possibly correct	TRUE	controllerType=0 controllerNumber=1 scan=55487	R	A	0.977	29.6	29.2	29.6	2	c10: Carbamidomethyl (+57.02), c13: Carbamidomethyl (+57.02)	n-term: TMT6plex (+229.16)	950.461	2848.36	2849.36	3	0.01465	5.14	3555.34	111000000	307	330	TRUE
	DPDIYAIGDcAScARPEGGFVPPR	NADH dehydrogenase OS=Klebsiella aerogenes OX=548 GN=YA35_24205 PE=4 SV=1	A0A094XHE6,A0A0H3FZ94	EAE_16455,YA35_24205	uniprot-Klebsiella aerogenes.fasta	47372.1	1	9	11	31	0.0001	0.281	possibly correct	TRUE	controllerType=0 controllerNumber=1 scan=55022	R	A	0.981	30.8	29.4	30.8	2	c10: Carbamidomethyl (+57.02), c13: Carbamidomethyl (+57.02)	n-term: TMT6plex (+229.16)	950.463	2848.37	2849.36	3	0.01904	6.683	3529.86	157000000	307	330	TRUE
CydA
	Peptide sequence	Protein name	Protein accession numbers	Alternate IDs	Database sources	Protein molecular weight (Da)	Protein identification probability	Exclusive unique peptide count	Exclusive unique spectrum count	Exclusive spectrum count	Percentage of total spectra	Percentage sequence coverage	Manual validation	Assigned	Spectrum name	Previous amino acid	Next amino acid	Peptide identification probability	Mascot Ion score	Mascot Identity score	Mascot Delta Ion Score	Number of enzymatic termini	Fixed modifications identified by spectrum	Variable modifications identified by spectrum	Observed m/z	Actual peptide mass (AMU)	Calculated +1H Peptide Mass (AMU)	Spectrum charge	Actual minus calculated peptide mass (AMU)	Actual minus calculated peptide mass (PPM)	Retention Time (sec)	Total Ion Current	Peptide start index	Peptide stop index	Exclusive	Other Proteins
	SVDkPVIGLk	Cytochrome d terminal oxidase subunit 1 OS=Klebsiella aerogenes OX=548 GN=YA35_05980 PE=3 SV=1	A0A837JYW3	cydA / YA35_05980	uniprot-Klebsiella aerogenes.fasta	58011.5	1	8	12	124	0.0003	0.155	possibly correct	TRUE	controllerType=0 controllerNumber=1 scan=41309	R	D	0.997	42	25	42	2		n-term: TMT6plex (+229.16), k4: TMT6plex (+229.16), k10: TMT6plex (+229.16)	872.075	1742.14	1743.13	2	0.008046	4.616	3019.13	59200000	299	308	TRUE
	DLmAQHEER	Cytochrome d terminal oxidase subunit 1 OS=Klebsiella aerogenes OX=548 GN=YA35_05980 PE=3 SV=1	A0A837JYW3	cydA / YA35_05980	uniprot-Klebsiella aerogenes.fasta	58011.5	1	8	12	124	0.0003	0.155	possibly correct	TRUE	controllerType=0 controllerNumber=1 scan=5188	K	I	0.968	24.7	25.6	24.7	2		n-term: TMT6plex (+229.16), m3: Oxidation (+15.99)	458.563	1372.67	1373.67	3	0.007316	5.326	932.758	2326840	309	317	TRUE
	DLMAQHEER	Cytochrome d terminal oxidase subunit 1 OS=Klebsiella aerogenes OX=548 GN=YA35_05980 PE=3 SV=1	A0A837JYW3	cydA / YA35_05980	uniprot-Klebsiella aerogenes.fasta	58011.5	1	8	12	124	0.0003	0.155	possibly correct	TRUE	controllerType=0 controllerNumber=1 scan=8679	K	I	0.972	24.6	25	24.6	2		n-term: TMT6plex (+229.16)	453.231	1356.67	1357.67	3	0.006603	4.863	1288.1	4714320	309	317	TRUE
	DLmAQHEER	Cytochrome d terminal oxidase subunit 1 OS=Klebsiella aerogenes OX=548 GN=YA35_05980 PE=3 SV=1	A0A837JYW3	cydA / YA35_05980	uniprot-Klebsiella aerogenes.fasta	58011.5	1	8	12	124	0.0003	0.155	possibly correct	TRUE	controllerType=0 controllerNumber=1 scan=4526	K	I	0.979	26.1	25.2	26.1	2		n-term: TMT6plex (+229.16), m3: Oxidation (+15.99)	458.563	1372.67	1373.67	3	0.005255	3.825	903.172	1852080	309	317	TRUE
	DLmAQHEER	Cytochrome d terminal oxidase subunit 1 OS=Klebsiella aerogenes OX=548 GN=YA35_05980 PE=3 SV=1	A0A837JYW3	cydA / YA35_05980	uniprot-Klebsiella aerogenes.fasta	58011.5	1	8	12	124	0.0003	0.155	possibly correct	TRUE	controllerType=0 controllerNumber=1 scan=4847	K	I	0.979	26.4	25.4	26.4	2		n-term: TMT6plex (+229.16), m3: Oxidation (+15.99)	458.563	1372.67	1373.67	3	0.007226	5.26	904.95	2509310	309	317	TRUE
	DLmAQHEER	Cytochrome d terminal oxidase subunit 1 OS=Klebsiella aerogenes OX=548 GN=YA35_05980 PE=3 SV=1	A0A837JYW3	cydA / YA35_05980	uniprot-Klebsiella aerogenes.fasta	58011.5	1	8	12	124	0.0003	0.155	possibly correct	TRUE	controllerType=0 controllerNumber=1 scan=5325	K	I	0.983	27.2	25.4	27.2	2		n-term: TMT6plex (+229.16), m3: Oxidation (+15.99)	458.563	1372.67	1373.67	3	0.006128	4.461	997.729	2165660	309	317	TRUE
	DLmAQHEER	Cytochrome d terminal oxidase subunit 1 OS=Klebsiella aerogenes OX=548 GN=YA35_05980 PE=3 SV=1	A0A837JYW3	cydA / YA35_05980	uniprot-Klebsiella aerogenes.fasta	58011.5	1	8	12	124	0.0003	0.155	possibly correct	TRUE	controllerType=0 controllerNumber=1 scan=6549	K	I	0.983	27.1	25.2	27.1	2		n-term: TMT6plex (+229.16), m3: Oxidation (+15.99)	458.563	1372.67	1373.67	3	0.00587	4.273	1121.37	2040740	309	317	TRUE
	DLmAQHEER	Cytochrome d terminal oxidase subunit 1 OS=Klebsiella aerogenes OX=548 GN=YA35_05980 PE=3 SV=1	A0A837JYW3	cydA / YA35_05980	uniprot-Klebsiella aerogenes.fasta	58011.5	1	8	12	124	0.0003	0.155	possibly correct	TRUE	controllerType=0 controllerNumber=1 scan=4993	K	I	0.986	28.2	25.4	28.2	2		n-term: TMT6plex (+229.16), m3: Oxidation (+15.99)	458.563	1372.67	1373.67	3	0.006401	4.66	960.255	1826660	309	317	TRUE
	DLmAQHEER	Cytochrome d terminal oxidase subunit 1 OS=Klebsiella aerogenes OX=548 GN=YA35_05980 PE=3 SV=1	A0A837JYW3	cydA / YA35_05980	uniprot-Klebsiella aerogenes.fasta	58011.5	1	8	12	124	0.0003	0.155	possibly correct	TRUE	controllerType=0 controllerNumber=1 scan=4488	K	I	0.987	28.2	25.2	28.2	2		n-term: TMT6plex (+229.16), m3: Oxidation (+15.99)	458.563	1372.67	1373.67	3	0.005984	4.356	899.464	1968700	309	317	TRUE
	DLmAQHEER	Cytochrome d terminal oxidase subunit 1 OS=Klebsiella aerogenes OX=548 GN=YA35_05980 PE=3 SV=1	A0A837JYW3	cydA / YA35_05980	uniprot-Klebsiella aerogenes.fasta	58011.5	1	8	12	124	0.0003	0.155	possibly correct	TRUE	controllerType=0 controllerNumber=1 scan=5209	K	I	0.988	28.7	25.2	28.7	2		n-term: TMT6plex (+229.16), m3: Oxidation (+15.99)	458.563	1372.67	1373.67	3	0.006146	4.474	985.396	1883840	309	317	TRUE
	DLmAQHEER	Cytochrome d terminal oxidase subunit 1 OS=Klebsiella aerogenes OX=548 GN=YA35_05980 PE=3 SV=1	A0A837JYW3	cydA / YA35_05980	uniprot-Klebsiella aerogenes.fasta	58011.5	1	8	12	124	0.0003	0.155	possibly correct	TRUE	controllerType=0 controllerNumber=1 scan=4582	K	I	0.993	31.6	25.2	31.6	2		n-term: TMT6plex (+229.16), m3: Oxidation (+15.99)	458.563	1372.67	1373.67	3	0.005621	4.092	906.885	1451680	309	317	TRUE
	DLmAQHEER	Cytochrome d terminal oxidase subunit 1 OS=Klebsiella aerogenes OX=548 GN=YA35_05980 PE=3 SV=1	A0A837JYW3	cydA / YA35_05980	uniprot-Klebsiella aerogenes.fasta	58011.5	1	8	12	124	0.0003	0.155	possibly correct	TRUE	controllerType=0 controllerNumber=1 scan=4633	K	I	0.994	31.9	25.2	31.9	2		n-term: TMT6plex (+229.16), m3: Oxidation (+15.99)	458.563	1372.67	1373.67	3	0.005195	3.782	915.411	2900970	309	317	TRUE
	DLmAQHEER	Cytochrome d terminal oxidase subunit 1 OS=Klebsiella aerogenes OX=548 GN=YA35_05980 PE=3 SV=1	A0A837JYW3	cydA / YA35_05980	uniprot-Klebsiella aerogenes.fasta	58011.5	1	8	12	124	0.0003	0.155	possibly correct	TRUE	controllerType=0 controllerNumber=1 scan=4688	K	I	0.995	33.3	25.2	33.3	2		n-term: TMT6plex (+229.16), m3: Oxidation (+15.99)	458.563	1372.67	1373.67	3	0.005798	4.221	923.817	2439440	309	317	TRUE
	DLmAQHEER	Cytochrome d terminal oxidase subunit 1 OS=Klebsiella aerogenes OX=548 GN=YA35_05980 PE=3 SV=1	A0A837JYW3	cydA / YA35_05980	uniprot-Klebsiella aerogenes.fasta	58011.5	1	8	12	124	0.0003	0.155	possibly correct	TRUE	controllerType=0 controllerNumber=1 scan=6176	K	I	0.997	35.2	25.2	35.2	2		n-term: TMT6plex (+229.16), m3: Oxidation (+15.99)	458.563	1372.67	1373.67	3	0.005939	4.323	1084.7	2444290	309	317	TRUE
	DLmAQHEER	Cytochrome d terminal oxidase subunit 1 OS=Klebsiella aerogenes OX=548 GN=YA35_05980 PE=3 SV=1	A0A837JYW3	cydA / YA35_05980	uniprot-Klebsiella aerogenes.fasta	58011.5	1	8	12	124	0.0003	0.155	possibly correct	TRUE	controllerType=0 controllerNumber=1 scan=6690	K	I	0.997	35.8	25.4	33.3	2		n-term: TMT6plex (+229.16), m3: Oxidation (+15.99)	458.563	1372.67	1373.67	3	0.007652	5.57	1134.29	1778200	309	317	TRUE
	DLmAQHEER	Cytochrome d terminal oxidase subunit 1 OS=Klebsiella aerogenes OX=548 GN=YA35_05980 PE=3 SV=1	A0A837JYW3	cydA / YA35_05980	uniprot-Klebsiella aerogenes.fasta	58011.5	1	8	12	124	0.0003	0.155	possibly correct	TRUE	controllerType=0 controllerNumber=1 scan=6054	K	I	0.997	36.5	25.4	33.3	2		n-term: TMT6plex (+229.16), m3: Oxidation (+15.99)	458.563	1372.67	1373.67	3	0.006551	4.769	1072.44	2689860	309	317	TRUE
	DLmAQHEER	Cytochrome d terminal oxidase subunit 1 OS=Klebsiella aerogenes OX=548 GN=YA35_05980 PE=3 SV=1	A0A837JYW3	cydA / YA35_05980	uniprot-Klebsiella aerogenes.fasta	58011.5	1	8	12	124	0.0003	0.155	possibly correct	TRUE	controllerType=0 controllerNumber=1 scan=5456	K	I	0.997	36.7	25.4	29.3	2		n-term: TMT6plex (+229.16), m3: Oxidation (+15.99)	458.563	1372.67	1373.67	3	0.00632	4.601	1011.52	2533410	309	317	TRUE
	DLmAQHEER	Cytochrome d terminal oxidase subunit 1 OS=Klebsiella aerogenes OX=548 GN=YA35_05980 PE=3 SV=1	A0A837JYW3	cydA / YA35_05980	uniprot-Klebsiella aerogenes.fasta	58011.5	1	8	12	124	0.0003	0.155	possibly correct	TRUE	controllerType=0 controllerNumber=1 scan=6425	K	I	0.997	37.3	25.2	37.3	2		n-term: TMT6plex (+229.16), m3: Oxidation (+15.99)	458.563	1372.67	1373.67	3	0.005549	4.039	1109.22	2322510	309	317	TRUE
	DLmAQHEER	Cytochrome d terminal oxidase subunit 1 OS=Klebsiella aerogenes OX=548 GN=YA35_05980 PE=3 SV=1	A0A837JYW3	cydA / YA35_05980	uniprot-Klebsiella aerogenes.fasta	58011.5	1	8	12	124	0.0003	0.155	possibly correct	TRUE	controllerType=0 controllerNumber=1 scan=4788	K	I	0.997	40.9	25.2	40.9	2		n-term: TMT6plex (+229.16), m3: Oxidation (+15.99)	458.563	1372.67	1373.67	3	0.006149	4.476	935.978	2003720	309	317	TRUE
	DLmAQHEER	Cytochrome d terminal oxidase subunit 1 OS=Klebsiella aerogenes OX=548 GN=YA35_05980 PE=3 SV=1	A0A837JYW3	cydA / YA35_05980	uniprot-Klebsiella aerogenes.fasta	58011.5	1	8	12	124	0.0003	0.155	possibly correct	TRUE	controllerType=0 controllerNumber=1 scan=5802	K	I	0.997	44.1	25.2	36.2	2		n-term: TMT6plex (+229.16), m3: Oxidation (+15.99)	458.563	1372.67	1373.67	3	0.006224	4.531	1048.08	2918840	309	317	TRUE
	DLmAQHEER	Cytochrome d terminal oxidase subunit 1 OS=Klebsiella aerogenes OX=548 GN=YA35_05980 PE=3 SV=1	A0A837JYW3	cydA / YA35_05980	uniprot-Klebsiella aerogenes.fasta	58011.5	1	8	12	124	0.0003	0.155	possibly correct	TRUE	controllerType=0 controllerNumber=1 scan=5572	K	I	0.997	46	25.5	36.4	2		n-term: TMT6plex (+229.16), m3: Oxidation (+15.99)	458.563	1372.67	1373.67	3	0.007061	5.14	1023.73	2874330	309	317	TRUE
	DLmAQHEER	Cytochrome d terminal oxidase subunit 1 OS=Klebsiella aerogenes OX=548 GN=YA35_05980 PE=3 SV=1	A0A837JYW3	cydA / YA35_05980	uniprot-Klebsiella aerogenes.fasta	58011.5	1	8	12	124	0.0003	0.155	possibly correct	TRUE	controllerType=0 controllerNumber=1 scan=5931	K	I	0.997	46	25.2	34.6	2		n-term: TMT6plex (+229.16), m3: Oxidation (+15.99)	458.563	1372.67	1373.67	3	0.005657	4.118	1060.29	2904150	309	317	TRUE
	DLmAQHEER	Cytochrome d terminal oxidase subunit 1 OS=Klebsiella aerogenes OX=548 GN=YA35_05980 PE=3 SV=1	A0A837JYW3	cydA / YA35_05980	uniprot-Klebsiella aerogenes.fasta	58011.5	1	8	12	124	0.0003	0.155	possibly correct	TRUE	controllerType=0 controllerNumber=1 scan=4994	K	I	0.997	46.5	25.4	39.2	2		n-term: TMT6plex (+229.16), m3: Oxidation (+15.99)	458.563	1372.67	1373.67	3	0.006311	4.594	917.29	8377660	309	317	TRUE
	DLmAQHEER	Cytochrome d terminal oxidase subunit 1 OS=Klebsiella aerogenes OX=548 GN=YA35_05980 PE=3 SV=1	A0A837JYW3	cydA / YA35_05980	uniprot-Klebsiella aerogenes.fasta	58011.5	1	8	12	124	0.0003	0.155	possibly correct	TRUE	controllerType=0 controllerNumber=1 scan=5683	K	I	0.997	51.7	25.4	42.9	2		n-term: TMT6plex (+229.16), m3: Oxidation (+15.99)	458.563	1372.67	1373.67	3	0.006602	4.806	1035.87	2812870	309	317	TRUE
	DLmAQHEER	Cytochrome d terminal oxidase subunit 1 OS=Klebsiella aerogenes OX=548 GN=YA35_05980 PE=3 SV=1	A0A837JYW3	cydA / YA35_05980	uniprot-Klebsiella aerogenes.fasta	58011.5	1	8	12	124	0.0003	0.155	possibly correct	TRUE	controllerType=0 controllerNumber=1 scan=4587	K	I	0.997	54.6	25.4	39.5	2		n-term: TMT6plex (+229.16), m3: Oxidation (+15.99)	458.563	1372.67	1373.67	3	0.006332	4.609	911.618	10100000	309	317	TRUE
	AYALLEQLR	Cytochrome d terminal oxidase subunit 1 OS=Klebsiella aerogenes OX=548 GN=YA35_05980 PE=3 SV=1	A0A837JYW3	cydA / YA35_05980	uniprot-Klebsiella aerogenes.fasta	58011.5	1	8	12	124	0.0003	0.155	possibly correct	TRUE	controllerType=0 controllerNumber=1 scan=63781	K	A	0.984	30.4	28.2	29.2	2		n-term: TMT6plex (+229.16)	653.393	1304.77	1305.77	2	0.006413	4.911	4346.16	244000000	324	332	TRUE
	AYALLEQLR	Cytochrome d terminal oxidase subunit 1 OS=Klebsiella aerogenes OX=548 GN=YA35_05980 PE=3 SV=1	A0A837JYW3	cydA / YA35_05980	uniprot-Klebsiella aerogenes.fasta	58011.5	1	8	12	124	0.0003	0.155	possibly correct	TRUE	controllerType=0 controllerNumber=1 scan=65710	K	A	0.988	34.9	31.3	18.6	2		n-term: TMT6plex (+229.16)	653.395	1304.77	1305.77	2	0.009029	6.914	4274.4	39500000	324	332	TRUE
	AYALLEQLR	Cytochrome d terminal oxidase subunit 1 OS=Klebsiella aerogenes OX=548 GN=YA35_05980 PE=3 SV=1	A0A837JYW3	cydA / YA35_05980	uniprot-Klebsiella aerogenes.fasta	58011.5	1	8	12	124	0.0003	0.155	possibly correct	TRUE	controllerType=0 controllerNumber=1 scan=62474	K	A	0.994	35	28.2	28	2		n-term: TMT6plex (+229.16)	653.395	1304.78	1305.77	2	0.009599	7.351	4234.94	47000000	324	332	TRUE
	AYALLEQLR	Cytochrome d terminal oxidase subunit 1 OS=Klebsiella aerogenes OX=548 GN=YA35_05980 PE=3 SV=1	A0A837JYW3	cydA / YA35_05980	uniprot-Klebsiella aerogenes.fasta	58011.5	1	8	12	124	0.0003	0.155	possibly correct	TRUE	controllerType=0 controllerNumber=1 scan=63557	K	A	0.994	35.5	28.2	30.1	2		n-term: TMT6plex (+229.16)	653.393	1304.77	1305.77	2	0.006571	5.032	4333.1	875000000	324	332	TRUE
	AYALLEQLR	Cytochrome d terminal oxidase subunit 1 OS=Klebsiella aerogenes OX=548 GN=YA35_05980 PE=3 SV=1	A0A837JYW3	cydA / YA35_05980	uniprot-Klebsiella aerogenes.fasta	58011.5	1	8	12	124	0.0003	0.155	possibly correct	TRUE	controllerType=0 controllerNumber=1 scan=64005	K	A	0.996	36.8	28.2	31.9	2		n-term: TMT6plex (+229.16)	653.393	1304.77	1305.77	2	0.006411	4.909	4359.19	264000000	324	332	TRUE
	AYALLEQLR	Cytochrome d terminal oxidase subunit 1 OS=Klebsiella aerogenes OX=548 GN=YA35_05980 PE=3 SV=1	A0A837JYW3	cydA / YA35_05980	uniprot-Klebsiella aerogenes.fasta	58011.5	1	8	12	124	0.0003	0.155	possibly correct	TRUE	controllerType=0 controllerNumber=1 scan=68559	K	A	0.996	36.9	28.1	32.6	2		n-term: TMT6plex (+229.16)	653.394	1304.77	1305.77	2	0.008031	6.15	4284.02	85900000	324	332	TRUE
	AYALLEQLR	Cytochrome d terminal oxidase subunit 1 OS=Klebsiella aerogenes OX=548 GN=YA35_05980 PE=3 SV=1	A0A837JYW3	cydA / YA35_05980	uniprot-Klebsiella aerogenes.fasta	58011.5	1	8	12	124	0.0003	0.155	possibly correct	TRUE	controllerType=0 controllerNumber=1 scan=66796	K	A	0.996	37.3	28	23	2		n-term: TMT6plex (+229.16)	653.394	1304.77	1305.77	2	0.006899	5.283	4339.12	29400000	324	332	TRUE
	AYALLEQLR	Cytochrome d terminal oxidase subunit 1 OS=Klebsiella aerogenes OX=548 GN=YA35_05980 PE=3 SV=1	A0A837JYW3	cydA / YA35_05980	uniprot-Klebsiella aerogenes.fasta	58011.5	1	8	12	124	0.0003	0.155	possibly correct	TRUE	controllerType=0 controllerNumber=1 scan=63097	K	A	0.996	37.5	28.2	31	2		n-term: TMT6plex (+229.16)	653.395	1304.77	1305.77	2	0.009383	7.186	4272.87	36700000	324	332	TRUE
	AYALLEQLR	Cytochrome d terminal oxidase subunit 1 OS=Klebsiella aerogenes OX=548 GN=YA35_05980 PE=3 SV=1	A0A837JYW3	cydA / YA35_05980	uniprot-Klebsiella aerogenes.fasta	58011.5	1	8	12	124	0.0003	0.155	possibly correct	TRUE	controllerType=0 controllerNumber=1 scan=62702	K	A	0.996	37.8	28	34	2		n-term: TMT6plex (+229.16)	653.394	1304.77	1305.77	2	0.008299	6.355	4288.75	34200000	324	332	TRUE
	AYALLEQLR	Cytochrome d terminal oxidase subunit 1 OS=Klebsiella aerogenes OX=548 GN=YA35_05980 PE=3 SV=1	A0A837JYW3	cydA / YA35_05980	uniprot-Klebsiella aerogenes.fasta	58011.5	1	8	12	124	0.0003	0.155	possibly correct	TRUE	controllerType=0 controllerNumber=1 scan=62577	K	A	0.996	41.2	31.4	31.7	2		n-term: TMT6plex (+229.16)	653.395	1304.77	1305.77	2	0.009273	7.101	4281.55	41100000	324	332	TRUE
	AYALLEQLR	Cytochrome d terminal oxidase subunit 1 OS=Klebsiella aerogenes OX=548 GN=YA35_05980 PE=3 SV=1	A0A837JYW3	cydA / YA35_05980	uniprot-Klebsiella aerogenes.fasta	58011.5	1	8	12	124	0.0003	0.155	possibly correct	TRUE	controllerType=0 controllerNumber=1 scan=64839	K	A	0.997	38.1	28.2	33.8	2		n-term: TMT6plex (+229.16)	653.395	1304.78	1305.77	2	0.009909	7.588	4409.74	27400000	324	332	TRUE
	AYALLEQLR	Cytochrome d terminal oxidase subunit 1 OS=Klebsiella aerogenes OX=548 GN=YA35_05980 PE=3 SV=1	A0A837JYW3	cydA / YA35_05980	uniprot-Klebsiella aerogenes.fasta	58011.5	1	8	12	124	0.0003	0.155	possibly correct	TRUE	controllerType=0 controllerNumber=1 scan=62363	K	A	0.997	38.4	28.2	23.7	2		n-term: TMT6plex (+229.16)	653.394	1304.77	1305.77	2	0.007217	5.527	4268.96	42100000	324	332	TRUE
	AYALLEQLR	Cytochrome d terminal oxidase subunit 1 OS=Klebsiella aerogenes OX=548 GN=YA35_05980 PE=3 SV=1	A0A837JYW3	cydA / YA35_05980	uniprot-Klebsiella aerogenes.fasta	58011.5	1	8	12	124	0.0003	0.155	possibly correct	TRUE	controllerType=0 controllerNumber=1 scan=67888	K	A	0.997	39.1	28.2	33.4	2		n-term: TMT6plex (+229.16)	653.394	1304.77	1305.77	2	0.007613	5.83	4246.05	358000000	324	332	TRUE
	AYALLEQLR	Cytochrome d terminal oxidase subunit 1 OS=Klebsiella aerogenes OX=548 GN=YA35_05980 PE=3 SV=1	A0A837JYW3	cydA / YA35_05980	uniprot-Klebsiella aerogenes.fasta	58011.5	1	8	12	124	0.0003	0.155	possibly correct	TRUE	controllerType=0 controllerNumber=1 scan=68336	K	A	0.997	39.1	28	32.1	2		n-term: TMT6plex (+229.16)	653.394	1304.77	1305.77	2	0.008639	6.616	4271.54	162000000	324	332	TRUE
	AYALLEQLR	Cytochrome d terminal oxidase subunit 1 OS=Klebsiella aerogenes OX=548 GN=YA35_05980 PE=3 SV=1	A0A837JYW3	cydA / YA35_05980	uniprot-Klebsiella aerogenes.fasta	58011.5	1	8	12	124	0.0003	0.155	possibly correct	TRUE	controllerType=0 controllerNumber=1 scan=63526	K	A	0.997	39.6	28.4	35.9	2		n-term: TMT6plex (+229.16)	653.392	1304.77	1305.77	2	0.004383	3.356	4281.05	26800000	324	332	TRUE
	AYALLEQLR	Cytochrome d terminal oxidase subunit 1 OS=Klebsiella aerogenes OX=548 GN=YA35_05980 PE=3 SV=1	A0A837JYW3	cydA / YA35_05980	uniprot-Klebsiella aerogenes.fasta	58011.5	1	8	12	124	0.0003	0.155	possibly correct	TRUE	controllerType=0 controllerNumber=1 scan=62888	K	A	0.997	39.6	28.2	31.2	2		n-term: TMT6plex (+229.16)	653.394	1304.77	1305.77	2	0.007733	5.922	4259.88	125000000	324	332	TRUE
	AYALLEQLR	Cytochrome d terminal oxidase subunit 1 OS=Klebsiella aerogenes OX=548 GN=YA35_05980 PE=3 SV=1	A0A837JYW3	cydA / YA35_05980	uniprot-Klebsiella aerogenes.fasta	58011.5	1	8	12	124	0.0003	0.155	possibly correct	TRUE	controllerType=0 controllerNumber=1 scan=64215	K	A	0.997	39.6	28	33.9	2		n-term: TMT6plex (+229.16)	653.393	1304.77	1305.77	2	0.006825	5.227	4371.73	112000000	324	332	TRUE
	AYALLEQLR	Cytochrome d terminal oxidase subunit 1 OS=Klebsiella aerogenes OX=548 GN=YA35_05980 PE=3 SV=1	A0A837JYW3	cydA / YA35_05980	uniprot-Klebsiella aerogenes.fasta	58011.5	1	8	12	124	0.0003	0.155	possibly correct	TRUE	controllerType=0 controllerNumber=1 scan=67448	K	A	0.997	40.3	28.1	35.9	2		n-term: TMT6plex (+229.16)	653.394	1304.77	1305.77	2	0.008053	6.167	4220.33	74200000	324	332	TRUE
	AYALLEQLR	Cytochrome d terminal oxidase subunit 1 OS=Klebsiella aerogenes OX=548 GN=YA35_05980 PE=3 SV=1	A0A837JYW3	cydA / YA35_05980	uniprot-Klebsiella aerogenes.fasta	58011.5	1	8	12	124	0.0003	0.155	possibly correct	TRUE	controllerType=0 controllerNumber=1 scan=63750	K	A	0.997	40.8	28.2	35.3	2		n-term: TMT6plex (+229.16)	653.393	1304.77	1305.77	2	0.005245	4.017	4294.17	60400000	324	332	TRUE
	AYALLEQLR	Cytochrome d terminal oxidase subunit 1 OS=Klebsiella aerogenes OX=548 GN=YA35_05980 PE=3 SV=1	A0A837JYW3	cydA / YA35_05980	uniprot-Klebsiella aerogenes.fasta	58011.5	1	8	12	124	0.0003	0.155	possibly correct	TRUE	controllerType=0 controllerNumber=1 scan=63960	K	A	0.997	40.8	28.2	37.5	2		n-term: TMT6plex (+229.16)	653.394	1304.77	1305.77	2	0.007705	5.9	4306.67	90900000	324	332	TRUE
	AYALLEQLR	Cytochrome d terminal oxidase subunit 1 OS=Klebsiella aerogenes OX=548 GN=YA35_05980 PE=3 SV=1	A0A837JYW3	cydA / YA35_05980	uniprot-Klebsiella aerogenes.fasta	58011.5	1	8	12	124	0.0003	0.155	possibly correct	TRUE	controllerType=0 controllerNumber=1 scan=66538	K	A	0.997	41.2	28	28.9	2		n-term: TMT6plex (+229.16)	653.394	1304.77	1305.77	2	0.007119	5.452	4324.17	54600000	324	332	TRUE
	AYALLEQLR	Cytochrome d terminal oxidase subunit 1 OS=Klebsiella aerogenes OX=548 GN=YA35_05980 PE=3 SV=1	A0A837JYW3	cydA / YA35_05980	uniprot-Klebsiella aerogenes.fasta	58011.5	1	8	12	124	0.0003	0.155	possibly correct	TRUE	controllerType=0 controllerNumber=1 scan=64424	K	A	0.997	41.7	28.2	35.2	2		n-term: TMT6plex (+229.16)	653.393	1304.77	1305.77	2	0.006623	5.072	4384.23	63300000	324	332	TRUE
	AYALLEQLR	Cytochrome d terminal oxidase subunit 1 OS=Klebsiella aerogenes OX=548 GN=YA35_05980 PE=3 SV=1	A0A837JYW3	cydA / YA35_05980	uniprot-Klebsiella aerogenes.fasta	58011.5	1	8	12	124	0.0003	0.155	possibly correct	TRUE	controllerType=0 controllerNumber=1 scan=65914	K	A	0.997	42	28.4	34.5	2		n-term: TMT6plex (+229.16)	653.392	1304.77	1305.77	2	0.004501	3.447	4286.76	130000000	324	332	TRUE
	AYALLEQLR	Cytochrome d terminal oxidase subunit 1 OS=Klebsiella aerogenes OX=548 GN=YA35_05980 PE=3 SV=1	A0A837JYW3	cydA / YA35_05980	uniprot-Klebsiella aerogenes.fasta	58011.5	1	8	12	124	0.0003	0.155	possibly correct	TRUE	controllerType=0 controllerNumber=1 scan=66331	K	A	0.997	41.8	28.2	32.7	2		n-term: TMT6plex (+229.16)	653.393	1304.77	1305.77	2	0.005921	4.534	4311.86	132000000	324	332	TRUE
	AYALLEQLR	Cytochrome d terminal oxidase subunit 1 OS=Klebsiella aerogenes OX=548 GN=YA35_05980 PE=3 SV=1	A0A837JYW3	cydA / YA35_05980	uniprot-Klebsiella aerogenes.fasta	58011.5	1	8	12	124	0.0003	0.155	possibly correct	TRUE	controllerType=0 controllerNumber=1 scan=66122	K	A	0.997	42	28.2	32.7	2		n-term: TMT6plex (+229.16)	653.393	1304.77	1305.77	2	0.005985	4.583	4299.48	223000000	324	332	TRUE
	AYALLEQLR	Cytochrome d terminal oxidase subunit 1 OS=Klebsiella aerogenes OX=548 GN=YA35_05980 PE=3 SV=1	A0A837JYW3	cydA / YA35_05980	uniprot-Klebsiella aerogenes.fasta	58011.5	1	8	12	124	0.0003	0.155	possibly correct	TRUE	controllerType=0 controllerNumber=1 scan=68111	K	A	0.997	42.1	28	34.4	2		n-term: TMT6plex (+229.16)	653.394	1304.77	1305.77	2	0.008209	6.286	4258.86	261000000	324	332	TRUE
	AYALLEQLR	Cytochrome d terminal oxidase subunit 1 OS=Klebsiella aerogenes OX=548 GN=YA35_05980 PE=3 SV=1	A0A837JYW3	cydA / YA35_05980	uniprot-Klebsiella aerogenes.fasta	58011.5	1	8	12	124	0.0003	0.155	possibly correct	TRUE	controllerType=0 controllerNumber=1 scan=67664	K	A	0.997	42.1	28	35.2	2		n-term: TMT6plex (+229.16)	653.394	1304.77	1305.77	2	0.008809	6.746	4232.89	251000000	324	332	TRUE
	AYALLEQLR	Cytochrome d terminal oxidase subunit 1 OS=Klebsiella aerogenes OX=548 GN=YA35_05980 PE=3 SV=1	A0A837JYW3	cydA / YA35_05980	uniprot-Klebsiella aerogenes.fasta	58011.5	1	8	12	124	0.0003	0.155	possibly correct	TRUE	controllerType=0 controllerNumber=1 scan=63141	K	A	0.997	44.5	28.2	36.8	2		n-term: TMT6plex (+229.16)	653.393	1304.77	1305.77	2	0.006391	4.894	4308.41	293000000	324	332	TRUE
	AYALLEQLR	Cytochrome d terminal oxidase subunit 1 OS=Klebsiella aerogenes OX=548 GN=YA35_05980 PE=3 SV=1	A0A837JYW3	cydA / YA35_05980	uniprot-Klebsiella aerogenes.fasta	58011.5	1	8	12	124	0.0003	0.155	possibly correct	TRUE	controllerType=0 controllerNumber=1 scan=62679	K	A	0.997	44.2	28	37.4	2		n-term: TMT6plex (+229.16)	653.394	1304.77	1305.77	2	0.008829	6.761	4247.33	173000000	324	332	TRUE
	AYALLEQLR	Cytochrome d terminal oxidase subunit 1 OS=Klebsiella aerogenes OX=548 GN=YA35_05980 PE=3 SV=1	A0A837JYW3	cydA / YA35_05980	uniprot-Klebsiella aerogenes.fasta	58011.5	1	8	12	124	0.0003	0.155	possibly correct	TRUE	controllerType=0 controllerNumber=1 scan=63349	K	A	0.997	46.8	28.2	38.9	2		n-term: TMT6plex (+229.16)	653.393	1304.77	1305.77	2	0.006397	4.899	4320.86	784000000	324	332	TRUE
	DLGYGLLLk	Cytochrome d terminal oxidase subunit 1 OS=Klebsiella aerogenes OX=548 GN=YA35_05980 PE=3 SV=1	A0A837JYW3	cydA / YA35_05980	uniprot-Klebsiella aerogenes.fasta	58011.5	1	8	12	124	0.0003	0.155	possibly correct	TRUE	controllerType=0 controllerNumber=1 scan=69253	K	R	0.988	28.6	25	12.2	2		n-term: TMT6plex (+229.16), k9: TMT6plex (+229.16)	725.462	1448.91	1449.91	2	0.007773	5.361	4645.41	46200000	350	358	TRUE
	DLGYGLLLk	Cytochrome d terminal oxidase subunit 1 OS=Klebsiella aerogenes OX=548 GN=YA35_05980 PE=3 SV=1	A0A837JYW3	cydA / YA35_05980	uniprot-Klebsiella aerogenes.fasta	58011.5	1	8	12	124	0.0003	0.155	possibly correct	TRUE	controllerType=0 controllerNumber=1 scan=69478	K	R	0.997	35.2	25	5.8	2		n-term: TMT6plex (+229.16), k9: TMT6plex (+229.16)	725.461	1448.91	1449.91	2	0.007015	4.838	4646.86	101000000	350	358	TRUE
	DLGYGLLLk	Cytochrome d terminal oxidase subunit 1 OS=Klebsiella aerogenes OX=548 GN=YA35_05980 PE=3 SV=1	A0A837JYW3	cydA / YA35_05980	uniprot-Klebsiella aerogenes.fasta	58011.5	1	8	12	124	0.0003	0.155	possibly correct	TRUE	controllerType=0 controllerNumber=1 scan=74146	K	R	0.997	35.2	25	10.7	2		n-term: TMT6plex (+229.16), k9: TMT6plex (+229.16)	725.462	1448.91	1449.91	2	0.009237	6.371	4612.4	81000000	350	358	TRUE
	DLGYGLLLk	Cytochrome d terminal oxidase subunit 1 OS=Klebsiella aerogenes OX=548 GN=YA35_05980 PE=3 SV=1	A0A837JYW3	cydA / YA35_05980	uniprot-Klebsiella aerogenes.fasta	58011.5	1	8	12	124	0.0003	0.155	possibly correct	TRUE	controllerType=0 controllerNumber=1 scan=69210	K	R	0.997	37.8	25.4	21	2		n-term: TMT6plex (+229.16), k9: TMT6plex (+229.16)	725.46	1448.9	1449.91	2	0.003379	2.331	4682.44	52200000	350	358	TRUE
	DLGYGLLLk	Cytochrome d terminal oxidase subunit 1 OS=Klebsiella aerogenes OX=548 GN=YA35_05980 PE=3 SV=1	A0A837JYW3	cydA / YA35_05980	uniprot-Klebsiella aerogenes.fasta	58011.5	1	8	12	124	0.0003	0.155	possibly correct	TRUE	controllerType=0 controllerNumber=1 scan=69074	K	R	0.997	38.6	25	34.1	2		n-term: TMT6plex (+229.16), k9: TMT6plex (+229.16)	725.462	1448.91	1449.91	2	0.008627	5.95	4678.64	34300000	350	358	TRUE
	DLGYGLLLk	Cytochrome d terminal oxidase subunit 1 OS=Klebsiella aerogenes OX=548 GN=YA35_05980 PE=3 SV=1	A0A837JYW3	cydA / YA35_05980	uniprot-Klebsiella aerogenes.fasta	58011.5	1	8	12	124	0.0003	0.155	possibly correct	TRUE	controllerType=0 controllerNumber=1 scan=69893	K	R	0.997	40.3	25	35.8	2		n-term: TMT6plex (+229.16), k9: TMT6plex (+229.16)	725.461	1448.91	1449.91	2	0.005647	3.895	4672.67	84300000	350	358	TRUE
	DLGYGLLLk	Cytochrome d terminal oxidase subunit 1 OS=Klebsiella aerogenes OX=548 GN=YA35_05980 PE=3 SV=1	A0A837JYW3	cydA / YA35_05980	uniprot-Klebsiella aerogenes.fasta	58011.5	1	8	12	124	0.0003	0.155	possibly correct	TRUE	controllerType=0 controllerNumber=1 scan=73936	K	R	0.997	41.8	25	16.5	2		n-term: TMT6plex (+229.16), k9: TMT6plex (+229.16)	725.462	1448.91	1449.91	2	0.007773	5.361	4599.61	175000000	350	358	TRUE
	DLGYGLLLk	Cytochrome d terminal oxidase subunit 1 OS=Klebsiella aerogenes OX=548 GN=YA35_05980 PE=3 SV=1	A0A837JYW3	cydA / YA35_05980	uniprot-Klebsiella aerogenes.fasta	58011.5	1	8	12	124	0.0003	0.155	possibly correct	TRUE	controllerType=0 controllerNumber=1 scan=67817	K	R	0.997	42.7	25	18.9	2		n-term: TMT6plex (+229.16), k9: TMT6plex (+229.16)	725.462	1448.91	1449.91	2	0.007387	5.095	4600.15	154000000	350	358	TRUE
	DLGYGLLLk	Cytochrome d terminal oxidase subunit 1 OS=Klebsiella aerogenes OX=548 GN=YA35_05980 PE=3 SV=1	A0A837JYW3	cydA / YA35_05980	uniprot-Klebsiella aerogenes.fasta	58011.5	1	8	12	124	0.0003	0.155	possibly correct	TRUE	controllerType=0 controllerNumber=1 scan=68848	K	R	0.997	47.5	25	42.4	2		n-term: TMT6plex (+229.16), k9: TMT6plex (+229.16)	725.461	1448.91	1449.91	2	0.005575	3.845	4664.41	51900000	350	358	TRUE
	DLGYGLLLk	Cytochrome d terminal oxidase subunit 1 OS=Klebsiella aerogenes OX=548 GN=YA35_05980 PE=3 SV=1	A0A837JYW3	cydA / YA35_05980	uniprot-Klebsiella aerogenes.fasta	58011.5	1	8	12	124	0.0003	0.155	possibly correct	TRUE	controllerType=0 controllerNumber=1 scan=69686	K	R	0.997	50.6	25	34.5	2		n-term: TMT6plex (+229.16), k9: TMT6plex (+229.16)	725.462	1448.91	1449.91	2	0.008261	5.698	4659.59	108000000	350	358	TRUE
	DLGYGLLLk	Cytochrome d terminal oxidase subunit 1 OS=Klebsiella aerogenes OX=548 GN=YA35_05980 PE=3 SV=1	A0A837JYW3	cydA / YA35_05980	uniprot-Klebsiella aerogenes.fasta	58011.5	1	8	12	124	0.0003	0.155	possibly correct	TRUE	controllerType=0 controllerNumber=1 scan=68234	K	R	0.997	56.1	25	49.8	2		n-term: TMT6plex (+229.16), k9: TMT6plex (+229.16)	725.462	1448.91	1449.91	2	0.007407	5.109	4625.97	555000000	350	358	TRUE
	DLGYGLLLk	Cytochrome d terminal oxidase subunit 1 OS=Klebsiella aerogenes OX=548 GN=YA35_05980 PE=3 SV=1	A0A837JYW3	cydA / YA35_05980	uniprot-Klebsiella aerogenes.fasta	58011.5	1	8	12	124	0.0003	0.155	possibly correct	TRUE	controllerType=0 controllerNumber=1 scan=68442	K	R	0.997	56.2	25	49.8	2		n-term: TMT6plex (+229.16), k9: TMT6plex (+229.16)	725.462	1448.91	1449.91	2	0.007651	5.277	4638.72	738000000	350	358	TRUE
	DLGYGLLLk	Cytochrome d terminal oxidase subunit 1 OS=Klebsiella aerogenes OX=548 GN=YA35_05980 PE=3 SV=1	A0A837JYW3	cydA / YA35_05980	uniprot-Klebsiella aerogenes.fasta	58011.5	1	8	12	124	0.0003	0.155	possibly correct	TRUE	controllerType=0 controllerNumber=1 scan=68826	K	R	0.997	57.3	25	41.3	2		n-term: TMT6plex (+229.16), k9: TMT6plex (+229.16)	725.463	1448.91	1449.91	2	0.009481	6.539	4619.8	105000000	350	358	TRUE
	DLGYGLLLk	Cytochrome d terminal oxidase subunit 1 OS=Klebsiella aerogenes OX=548 GN=YA35_05980 PE=3 SV=1	A0A837JYW3	cydA / YA35_05980	uniprot-Klebsiella aerogenes.fasta	58011.5	1	8	12	124	0.0003	0.155	possibly correct	TRUE	controllerType=0 controllerNumber=1 scan=69033	K	R	0.997	59	25	45.3	2		n-term: TMT6plex (+229.16), k9: TMT6plex (+229.16)	725.461	1448.91	1449.91	2	0.007183	4.954	4632.25	59300000	350	358	TRUE
	DLGYGLLLk	Cytochrome d terminal oxidase subunit 1 OS=Klebsiella aerogenes OX=548 GN=YA35_05980 PE=3 SV=1	A0A837JYW3	cydA / YA35_05980	uniprot-Klebsiella aerogenes.fasta	58011.5	1	8	12	124	0.0003	0.155	possibly correct	TRUE	controllerType=0 controllerNumber=1 scan=68025	K	R	0.997	60.2	25	47.5	2		n-term: TMT6plex (+229.16), k9: TMT6plex (+229.16)	725.462	1448.91	1449.91	2	0.007859	5.421	4613.13	315000000	350	358	TRUE
	DLGYGLLLk	Cytochrome d terminal oxidase subunit 1 OS=Klebsiella aerogenes OX=548 GN=YA35_05980 PE=3 SV=1	A0A837JYW3	cydA / YA35_05980	uniprot-Klebsiella aerogenes.fasta	58011.5	1	8	12	124	0.0003	0.155	possibly correct	TRUE	controllerType=0 controllerNumber=1 scan=68651	K	R	0.997	60.2	25	53	2		n-term: TMT6plex (+229.16), k9: TMT6plex (+229.16)	725.462	1448.91	1449.91	2	0.007651	5.277	4651.83	264000000	350	358	TRUE
	RYTPNVADATEEQIAk	Cytochrome d terminal oxidase subunit 1 OS=Klebsiella aerogenes OX=548 GN=YA35_05980 PE=3 SV=1	A0A837JYW3	cydA / YA35_05980	uniprot-Klebsiella aerogenes.fasta	58011.5	1	8	12	124	0.0003	0.155	possibly correct	TRUE	controllerType=0 controllerNumber=1 scan=33735	K	A	0.996	39.1	30.5	37.9	2		n-term: TMT6plex (+229.16), k16: TMT6plex (+229.16)	755.415	2263.22	2264.23	3	0.002667	1.178	2671.48	78100000	359	374	TRUE
	RYTPNVADATEEQIAk	Cytochrome d terminal oxidase subunit 1 OS=Klebsiella aerogenes OX=548 GN=YA35_05980 PE=3 SV=1	A0A837JYW3	cydA / YA35_05980	uniprot-Klebsiella aerogenes.fasta	58011.5	1	8	12	124	0.0003	0.155	possibly correct	TRUE	controllerType=0 controllerNumber=1 scan=33243	K	A	0.997	57.7	30.2	49.7	2		n-term: TMT6plex (+229.16), k16: TMT6plex (+229.16)	755.418	2263.23	2264.23	3	0.0113	4.991	2645.8	145000000	359	374	TRUE
	DSIPSVAPLYFAFR	Cytochrome d terminal oxidase subunit 1 OS=Klebsiella aerogenes OX=548 GN=YA35_05980 PE=3 SV=1	A0A837JYW3	cydA / YA35_05980	uniprot-Klebsiella aerogenes.fasta	58011.5	1	8	12	124	0.0003	0.155	possibly correct	TRUE	controllerType=0 controllerNumber=1 scan=80667	K	I	0.997	41.5	29.3	38.7	2		n-term: TMT6plex (+229.16)	906.501	1810.99	1811.99	2	0.006047	3.337	5425.47	18600000	378	391	TRUE
	DSIPSVAPLYFAFR	Cytochrome d terminal oxidase subunit 1 OS=Klebsiella aerogenes OX=548 GN=YA35_05980 PE=3 SV=1	A0A837JYW3	cydA / YA35_05980	uniprot-Klebsiella aerogenes.fasta	58011.5	1	8	12	124	0.0003	0.155	possibly correct	TRUE	controllerType=0 controllerNumber=1 scan=81433	K	I	0.997	43.9	29.3	43.9	2		n-term: TMT6plex (+229.16)	906.503	1810.99	1811.99	2	0.008825	4.87	5475.96	33600000	378	391	TRUE
	DSIPSVAPLYFAFR	Cytochrome d terminal oxidase subunit 1 OS=Klebsiella aerogenes OX=548 GN=YA35_05980 PE=3 SV=1	A0A837JYW3	cydA / YA35_05980	uniprot-Klebsiella aerogenes.fasta	58011.5	1	8	12	124	0.0003	0.155	possibly correct	TRUE	controllerType=0 controllerNumber=1 scan=81241	K	I	0.997	44	29.2	44	2		n-term: TMT6plex (+229.16)	906.503	1810.99	1811.99	2	0.009079	5.01	5463.39	79100000	378	391	TRUE
	DSIPSVAPLYFAFR	Cytochrome d terminal oxidase subunit 1 OS=Klebsiella aerogenes OX=548 GN=YA35_05980 PE=3 SV=1	A0A837JYW3	cydA / YA35_05980	uniprot-Klebsiella aerogenes.fasta	58011.5	1	8	12	124	0.0003	0.155	possibly correct	TRUE	controllerType=0 controllerNumber=1 scan=81049	K	I	0.997	44.4	29.1	44.4	2		n-term: TMT6plex (+229.16)	906.503	1810.99	1811.99	2	0.01024	5.654	5450.77	62900000	378	391	TRUE
	DSIPSVAPLYFAFR	Cytochrome d terminal oxidase subunit 1 OS=Klebsiella aerogenes OX=548 GN=YA35_05980 PE=3 SV=1	A0A837JYW3	cydA / YA35_05980	uniprot-Klebsiella aerogenes.fasta	58011.5	1	8	12	124	0.0003	0.155	possibly correct	TRUE	controllerType=0 controllerNumber=1 scan=80857	K	I	0.997	49.7	29.1	47	2		n-term: TMT6plex (+229.16)	906.506	1811	1811.99	2	0.01466	8.092	5438.17	43000000	378	391	TRUE
	YHFEQSSAAIQSAR	Cytochrome d terminal oxidase subunit 1 OS=Klebsiella aerogenes OX=548 GN=YA35_05980 PE=3 SV=1	A0A837JYW3	cydA / YA35_05980	uniprot-Klebsiella aerogenes.fasta	58011.5	1	8	12	124	0.0003	0.155	possibly correct	TRUE	controllerType=0 controllerNumber=1 scan=24281	R	-	0.979	30.8	29.8	30.8	2		n-term: TMT6plex (+229.16)	608.65	1822.93	1823.92	3	0.01056	5.79	2158.02	185000000	509	522	TRUE
	YHFEQSSAAIQSAR	Cytochrome d terminal oxidase subunit 1 OS=Klebsiella aerogenes OX=548 GN=YA35_05980 PE=3 SV=1	A0A837JYW3	cydA / YA35_05980	uniprot-Klebsiella aerogenes.fasta	58011.5	1	8	12	124	0.0003	0.155	possibly correct	TRUE	controllerType=0 controllerNumber=1 scan=21885	R	-	0.991	34.8	30.1	34.8	2		n-term: TMT6plex (+229.16)	608.65	1822.93	1823.92	3	0.01038	5.689	2048.79	105000000	509	522	TRUE
	YHFEQSSAAIQSAR	Cytochrome d terminal oxidase subunit 1 OS=Klebsiella aerogenes OX=548 GN=YA35_05980 PE=3 SV=1	A0A837JYW3	cydA / YA35_05980	uniprot-Klebsiella aerogenes.fasta	58011.5	1	8	12	124	0.0003	0.155	possibly correct	TRUE	controllerType=0 controllerNumber=1 scan=25467	R	-	0.997	40.2	29.9	37.2	2		n-term: TMT6plex (+229.16)	608.65	1822.93	1823.92	3	0.01294	7.095	2097.31	344000000	509	522	TRUE
	YHFEQSSAAIQSAR	Cytochrome d terminal oxidase subunit 1 OS=Klebsiella aerogenes OX=548 GN=YA35_05980 PE=3 SV=1	A0A837JYW3	cydA / YA35_05980	uniprot-Klebsiella aerogenes.fasta	58011.5	1	8	12	124	0.0003	0.155	possibly correct	TRUE	controllerType=0 controllerNumber=1 scan=24404	R	-	0.997	40.4	29.9	37.1	2		n-term: TMT6plex (+229.16)	608.649	1822.93	1823.92	3	0.009111	4.995	2115.04	352000000	509	522	TRUE
	YHFEQSSAAIQSAR	Cytochrome d terminal oxidase subunit 1 OS=Klebsiella aerogenes OX=548 GN=YA35_05980 PE=3 SV=1	A0A837JYW3	cydA / YA35_05980	uniprot-Klebsiella aerogenes.fasta	58011.5	1	8	12	124	0.0003	0.155	possibly correct	TRUE	controllerType=0 controllerNumber=1 scan=24989	R	-	0.997	41.7	29.8	41.7	2		n-term: TMT6plex (+229.16)	608.65	1822.93	1823.92	3	0.01221	6.693	2072.47	71700000	509	522	TRUE
	YHFEQSSAAIQSAR	Cytochrome d terminal oxidase subunit 1 OS=Klebsiella aerogenes OX=548 GN=YA35_05980 PE=3 SV=1	A0A837JYW3	cydA / YA35_05980	uniprot-Klebsiella aerogenes.fasta	58011.5	1	8	12	124	0.0003	0.155	possibly correct	TRUE	controllerType=0 controllerNumber=1 scan=25132	R	-	0.997	42.8	29.9	39	2		n-term: TMT6plex (+229.16)	912.472	1822.93	1823.92	2	0.01281	7.026	2079.95	33800000	509	522	TRUE
	YHFEQSSAAIQSAR	Cytochrome d terminal oxidase subunit 1 OS=Klebsiella aerogenes OX=548 GN=YA35_05980 PE=3 SV=1	A0A837JYW3	cydA / YA35_05980	uniprot-Klebsiella aerogenes.fasta	58011.5	1	8	12	124	0.0003	0.155	possibly correct	TRUE	controllerType=0 controllerNumber=1 scan=22618	R	-	0.997	43.3	29.8	42.6	2		n-term: TMT6plex (+229.16)	608.65	1822.93	1823.92	3	0.01239	6.794	2086.59	173000000	509	522	TRUE
	YHFEQSSAAIQSAR	Cytochrome d terminal oxidase subunit 1 OS=Klebsiella aerogenes OX=548 GN=YA35_05980 PE=3 SV=1	A0A837JYW3	cydA / YA35_05980	uniprot-Klebsiella aerogenes.fasta	58011.5	1	8	12	124	0.0003	0.155	possibly correct	TRUE	controllerType=0 controllerNumber=1 scan=24645	R	-	0.997	43.4	30	43.4	2		n-term: TMT6plex (+229.16)	608.649	1822.92	1823.92	3	0.00849	4.655	2127.85	153000000	509	522	TRUE
	YHFEQSSAAIQSAR	Cytochrome d terminal oxidase subunit 1 OS=Klebsiella aerogenes OX=548 GN=YA35_05980 PE=3 SV=1	A0A837JYW3	cydA / YA35_05980	uniprot-Klebsiella aerogenes.fasta	58011.5	1	8	12	124	0.0003	0.155	possibly correct	TRUE	controllerType=0 controllerNumber=1 scan=22136	R	-	0.997	46.8	29.8	46.8	2		n-term: TMT6plex (+229.16)	608.65	1822.93	1823.92	3	0.01128	6.186	2061.46	335000000	509	522	TRUE
	YHFEQSSAAIQSAR	Cytochrome d terminal oxidase subunit 1 OS=Klebsiella aerogenes OX=548 GN=YA35_05980 PE=3 SV=1	A0A837JYW3	cydA / YA35_05980	uniprot-Klebsiella aerogenes.fasta	58011.5	1	8	12	124	0.0003	0.155	possibly correct	TRUE	controllerType=0 controllerNumber=1 scan=23752	R	-	0.997	47.6	29.9	47.6	2		n-term: TMT6plex (+229.16)	912.469	1822.92	1823.92	2	0.006795	3.725	2080.73	27700000	509	522	TRUE
	YHFEQSSAAIQSAR	Cytochrome d terminal oxidase subunit 1 OS=Klebsiella aerogenes OX=548 GN=YA35_05980 PE=3 SV=1	A0A837JYW3	cydA / YA35_05980	uniprot-Klebsiella aerogenes.fasta	58011.5	1	8	12	124	0.0003	0.155	possibly correct	TRUE	controllerType=0 controllerNumber=1 scan=22090	R	-	0.997	47.5	29.8	47.5	2		n-term: TMT6plex (+229.16)	912.467	1822.92	1823.92	2	0.003683	2.019	2059.16	51200000	509	522	TRUE
	YHFEQSSAAIQSAR	Cytochrome d terminal oxidase subunit 1 OS=Klebsiella aerogenes OX=548 GN=YA35_05980 PE=3 SV=1	A0A837JYW3	cydA / YA35_05980	uniprot-Klebsiella aerogenes.fasta	58011.5	1	8	12	124	0.0003	0.155	possibly correct	TRUE	controllerType=0 controllerNumber=1 scan=24164	R	-	0.997	49.2	29.9	49.2	2		n-term: TMT6plex (+229.16)	608.649	1822.93	1823.92	3	0.009618	5.273	2102.21	699000000	509	522	TRUE
	YHFEQSSAAIQSAR	Cytochrome d terminal oxidase subunit 1 OS=Klebsiella aerogenes OX=548 GN=YA35_05980 PE=3 SV=1	A0A837JYW3	cydA / YA35_05980	uniprot-Klebsiella aerogenes.fasta	58011.5	1	8	12	124	0.0003	0.155	possibly correct	TRUE	controllerType=0 controllerNumber=1 scan=25229	R	-	0.997	49.5	29.8	49.5	2		n-term: TMT6plex (+229.16)	608.65	1822.93	1823.92	3	0.01147	6.291	2084.96	281000000	509	522	TRUE
	YHFEQSSAAIQSAR	Cytochrome d terminal oxidase subunit 1 OS=Klebsiella aerogenes OX=548 GN=YA35_05980 PE=3 SV=1	A0A837JYW3	cydA / YA35_05980	uniprot-Klebsiella aerogenes.fasta	58011.5	1	8	12	124	0.0003	0.155	possibly correct	TRUE	controllerType=0 controllerNumber=1 scan=23797	R	-	0.997	49.9	29.9	47.1	2		n-term: TMT6plex (+229.16)	608.649	1822.93	1823.92	3	0.01014	5.558	2132.05	872000000	509	522	TRUE
	YHFEQSSAAIQSAR	Cytochrome d terminal oxidase subunit 1 OS=Klebsiella aerogenes OX=548 GN=YA35_05980 PE=3 SV=1	A0A837JYW3	cydA / YA35_05980	uniprot-Klebsiella aerogenes.fasta	58011.5	1	8	12	124	0.0003	0.155	possibly correct	TRUE	controllerType=0 controllerNumber=1 scan=23845	R	-	0.997	50.7	30	49.7	2		n-term: TMT6plex (+229.16)	912.47	1822.93	1823.92	2	0.008811	4.831	2134.61	131000000	509	522	TRUE
	YHFEQSSAAIQSAR	Cytochrome d terminal oxidase subunit 1 OS=Klebsiella aerogenes OX=548 GN=YA35_05980 PE=3 SV=1	A0A837JYW3	cydA / YA35_05980	uniprot-Klebsiella aerogenes.fasta	58011.5	1	8	12	124	0.0003	0.155	possibly correct	TRUE	controllerType=0 controllerNumber=1 scan=22375	R	-	0.997	51.7	29.8	50.6	2		n-term: TMT6plex (+229.16)	608.65	1822.93	1823.92	3	0.01069	5.862	2073.87	451000000	509	522	TRUE
	YHFEQSSAAIQSAR	Cytochrome d terminal oxidase subunit 1 OS=Klebsiella aerogenes OX=548 GN=YA35_05980 PE=3 SV=1	A0A837JYW3	cydA / YA35_05980	uniprot-Klebsiella aerogenes.fasta	58011.5	1	8	12	124	0.0003	0.155	possibly correct	TRUE	controllerType=0 controllerNumber=1 scan=24037	R	-	0.997	51.7	29.8	48.1	2		n-term: TMT6plex (+229.16)	608.65	1822.93	1823.92	3	0.0111	6.086	2144.89	584000000	509	522	TRUE
	YHFEQSSAAIQSAR	Cytochrome d terminal oxidase subunit 1 OS=Klebsiella aerogenes OX=548 GN=YA35_05980 PE=3 SV=1	A0A837JYW3	cydA / YA35_05980	uniprot-Klebsiella aerogenes.fasta	58011.5	1	8	12	124	0.0003	0.155	possibly correct	TRUE	controllerType=0 controllerNumber=1 scan=23924	R	-	0.997	52.2	30	51.6	2		n-term: TMT6plex (+229.16)	608.649	1822.93	1823.92	3	0.008739	4.791	2089.9	1000000000	509	522	TRUE
	YHFEQSSAAIQSAR	Cytochrome d terminal oxidase subunit 1 OS=Klebsiella aerogenes OX=548 GN=YA35_05980 PE=3 SV=1	A0A837JYW3	cydA / YA35_05980	uniprot-Klebsiella aerogenes.fasta	58011.5	1	8	12	124	0.0003	0.155	possibly correct	TRUE	controllerType=0 controllerNumber=1 scan=25833	R	-	0.997	52.7	29.9	52.5	2		n-term: TMT6plex (+229.16)	912.47	1822.93	1823.92	2	0.009475	5.195	2042.14	40400000	509	522	TRUE
	YHFEQSSAAIQSAR	Cytochrome d terminal oxidase subunit 1 OS=Klebsiella aerogenes OX=548 GN=YA35_05980 PE=3 SV=1	A0A837JYW3	cydA / YA35_05980	uniprot-Klebsiella aerogenes.fasta	58011.5	1	8	12	124	0.0003	0.155	possibly correct	TRUE	controllerType=0 controllerNumber=1 scan=25373	R	-	0.997	53	30	53	2		n-term: TMT6plex (+229.16)	912.474	1822.93	1823.92	2	0.01664	9.123	2092.52	55300000	509	522	TRUE
	YHFEQSSAAIQSAR	Cytochrome d terminal oxidase subunit 1 OS=Klebsiella aerogenes OX=548 GN=YA35_05980 PE=3 SV=1	A0A837JYW3	cydA / YA35_05980	uniprot-Klebsiella aerogenes.fasta	58011.5	1	8	12	124	0.0003	0.155	possibly correct	TRUE	controllerType=0 controllerNumber=1 scan=24086	R	-	0.997	55.1	29.9	53.5	2		n-term: TMT6plex (+229.16)	912.472	1822.93	1823.92	2	0.01392	7.631	2147.62	63700000	509	522	TRUE
	YHFEQSSAAIQSAR	Cytochrome d terminal oxidase subunit 1 OS=Klebsiella aerogenes OX=548 GN=YA35_05980 PE=3 SV=1	A0A837JYW3	cydA / YA35_05980	uniprot-Klebsiella aerogenes.fasta	58011.5	1	8	12	124	0.0003	0.155	possibly correct	TRUE	controllerType=0 controllerNumber=1 scan=23087	R	-	0.997	55.4	29.9	55.4	2		n-term: TMT6plex (+229.16)	608.648	1822.92	1823.92	3	0.006165	3.38	2114.96	138000000	509	522	TRUE
	YHFEQSSAAIQSAR	Cytochrome d terminal oxidase subunit 1 OS=Klebsiella aerogenes OX=548 GN=YA35_05980 PE=3 SV=1	A0A837JYW3	cydA / YA35_05980	uniprot-Klebsiella aerogenes.fasta	58011.5	1	8	12	124	0.0003	0.155	possibly correct	TRUE	controllerType=0 controllerNumber=1 scan=22346	R	-	0.997	57.3	29.9	56.4	2		n-term: TMT6plex (+229.16)	912.471	1822.93	1823.92	2	0.01026	5.628	2072.23	65400000	509	522	TRUE
	YHFEQSSAAIQSAR	Cytochrome d terminal oxidase subunit 1 OS=Klebsiella aerogenes OX=548 GN=YA35_05980 PE=3 SV=1	A0A837JYW3	cydA / YA35_05980	uniprot-Klebsiella aerogenes.fasta	58011.5	1	8	12	124	0.0003	0.155	possibly correct	TRUE	controllerType=0 controllerNumber=1 scan=24469	R	-	0.997	58	29.9	58	2		n-term: TMT6plex (+229.16)	912.468	1822.92	1823.92	2	0.005599	3.07	2118.56	43100000	509	522	TRUE
	YHFEQSSAAIQSAR	Cytochrome d terminal oxidase subunit 1 OS=Klebsiella aerogenes OX=548 GN=YA35_05980 PE=3 SV=1	A0A837JYW3	cydA / YA35_05980	uniprot-Klebsiella aerogenes.fasta	58011.5	1	8	12	124	0.0003	0.155	possibly correct	TRUE	controllerType=0 controllerNumber=1 scan=23988	R	-	0.997	58.2	30	58.2	2		n-term: TMT6plex (+229.16)	912.469	1822.92	1823.92	2	0.007873	4.316	2093.18	180000000	509	522	TRUE
	YHFEQSSAAIQSAR	Cytochrome d terminal oxidase subunit 1 OS=Klebsiella aerogenes OX=548 GN=YA35_05980 PE=3 SV=1	A0A837JYW3	cydA / YA35_05980	uniprot-Klebsiella aerogenes.fasta	58011.5	1	8	12	124	0.0003	0.155	possibly correct	TRUE	controllerType=0 controllerNumber=1 scan=24229	R	-	0.997	59	29.9	58.8	2		n-term: TMT6plex (+229.16)	912.469	1822.92	1823.92	2	0.006223	3.412	2105.64	68900000	509	522	TRUE

## Sheet: Peptide Report
CyoA	Protein name	Protein accession numbers	Alternate IDs	Database sources	Protein molecular weight (Da)	Protein identification probability	Exclusive unique peptide count	Exclusive unique spectrum count	Exclusive spectrum count	Percentage of total spectra	Percentage sequence coverage	Peptide sequence	Previous amino acid	Next amino acid	Best Peptide identification probability	Best Mascot Ion Score	Best Mascot Identity Score	Best Mascot Homology Score	Best Mascot Delta Ion Score	Number of identified +1H spectra	Number of identified +2H spectra	Number of identified +3H spectra	Number of identified +4H spectra	Number of enzymatic termini	Calculated +1H Peptide Mass (AMU)	Median Retention Time	Total Precursor Intensity	Total TIC	Peptide start index	Peptide stop index	Assigned	Other Proteins
	Ubiquinol oxidase subunit 2 OS=Klebsiella aerogenes OX=548 GN=cyoA PE=3 SV=1	A0A0F1LA05,A0A0H3FSP7	EAE_12730,cyoA	uniprot-Klebsiella aerogenes.fasta	34774.6	1	6	16	80	0.0002	0.204	GQIGLEQR	K	S	0.99	38.7	26.9	26.4	22.4	0	14	0	0	2	1129.65	1580.28		855000000	34	41	TRUE
	Ubiquinol oxidase subunit 2 OS=Klebsiella aerogenes OX=548 GN=cyoA PE=3 SV=1	A0A0F1LA05,A0A0H3FSP7	EAE_12730,cyoA	uniprot-Klebsiella aerogenes.fasta	34774.6	1	6	16	80	0.0002	0.204	YSPNWSHSNK	K	V	0.997	45.8	29.8	13	40.9	0	1	6	0	2	1677.87	1982.87		1070000000	78	87	TRUE
	Ubiquinol oxidase subunit 2 OS=Klebsiella aerogenes OX=548 GN=cyoA PE=3 SV=1	A0A0F1LA05,A0A0H3FSP7	EAE_12730,cyoA	uniprot-Klebsiella aerogenes.fasta	34774.6	1	6	16	80	0.0002	0.204	VTSNSVMNSFFIPR	K	L	0.997	80.2	29.5	0	80.2	0	22	11	0	2	1843.96	3833.37		2580000000	165	178	TRUE
	Ubiquinol oxidase subunit 2 OS=Klebsiella aerogenes OX=548 GN=cyoA PE=3 SV=1	A0A0F1LA05,A0A0H3FSP7	EAE_12730,cyoA	uniprot-Klebsiella aerogenes.fasta	34774.6	1	6	16	80	0.0002	0.204	ATFDQWVAK	R	A	0.997	54.5	27.7	21	37.9	0	8	3	0	2	1523.86	3776.45		4270000000	229	237	TRUE
	Ubiquinol oxidase subunit 2 OS=Klebsiella aerogenes OX=548 GN=cyoA PE=3 SV=1	A0A0F1LA05,A0A0H3FSP7	EAE_12730,cyoA	uniprot-Klebsiella aerogenes.fasta	34774.6	1	6	16	80	0.0002	0.204	QSPNSMDSMAAFDK	K	V	0.997	71.4	26.9	0	71.4	0	1	1	0	2	2018.96	1969.21		100000000	240	253	TRUE
	Ubiquinol oxidase subunit 2 OS=Klebsiella aerogenes OX=548 GN=cyoA PE=3 SV=1	A0A0F1LA05,A0A0H3FSP7	EAE_12730,cyoA	uniprot-Klebsiella aerogenes.fasta	34774.6	1	6	16	80	0.0002	0.204	VAVPSENNK	K	V	0.997	43.2	28.2	13.3	39.2	0	13	0	0	2	1415.83	1928.42		1390000000	254	262	TRUE
CyoB	Protein name	Protein accession numbers	Alternate IDs	Database sources	Protein molecular weight (Da)	Protein identification probability	Exclusive unique peptide count	Exclusive unique spectrum count	Exclusive spectrum count	Percentage of total spectra	Percentage sequence coverage	Peptide sequence	Previous amino acid	Next amino acid	Best Peptide identification probability	Best Mascot Ion Score	Best Mascot Identity Score	Best Mascot Homology Score	Best Mascot Delta Ion Score	Number of identified +1H spectra	Number of identified +2H spectra	Number of identified +3H spectra	Number of identified +4H spectra	Number of enzymatic termini	Calculated +1H Peptide Mass (AMU)	Median Retention Time	Total Precursor Intensity	Total TIC	Peptide start index	Peptide stop index	Assigned	Other Proteins
	Cytochrome bo(3) ubiquinol oxidase subunit 1 OS=Klebsiella aerogenes OX=548 GN=cyoB PE=3 SV=1	A0A447LCJ9	cyoB	uniprot-Klebsiella aerogenes.fasta	67569.6	1	7	10	33	0.0001	0.156	APGMTMFK	R	M	0.99	33.5	27.8	0	33.3	0	1	0	0	2	1340.75	3273.43		206000000	158	165	TRUE
	Cytochrome bo(3) ubiquinol oxidase subunit 1 OS=Klebsiella aerogenes OX=548 GN=cyoB PE=3 SV=1	A0A447LCJ9	cyoB	uniprot-Klebsiella aerogenes.fasta	67569.6	1	7	10	33	0.0001	0.156	AFGFTLNETWGK	K	R	0.997	58.5	32.5	13.5	58	0	1	0	0	2	1829	4953.98		28000000	384	395	TRUE
	Cytochrome bo(3) ubiquinol oxidase subunit 1 OS=Klebsiella aerogenes OX=548 GN=cyoB PE=3 SV=1	A0A447LCJ9	cyoB	uniprot-Klebsiella aerogenes.fasta	67569.6	1	7	10	33	0.0001	0.156	DLTGDPWGGR	R	T	0.997	37.6	27.2	17.1	32	0	8	0	0	2	1302.66	2776.8		10700000000	469	478	TRUE
	Cytochrome bo(3) ubiquinol oxidase subunit 1 OS=Klebsiella aerogenes OX=548 GN=cyoB PE=3 SV=1	A0A447LCJ9	cyoB	uniprot-Klebsiella aerogenes.fasta	67569.6	1	7	10	33	0.0001	0.156	TLEWATSSPPPFYNFAVVPNVHER	R	D	0.997	47.5	32.4	18	43.4	0	0	1	7	2	2987.53	5211.82		554000000	479	502	TRUE
	Cytochrome bo(3) ubiquinol oxidase subunit 1 OS=Klebsiella aerogenes OX=548 GN=cyoB PE=3 SV=1	A0A447LCJ9	cyoB	uniprot-Klebsiella aerogenes.fasta	67569.6	1	7	10	33	0.0001	0.156	QPAHYEEIHMPK	K	N	0.987	32.7	29.5	13.1	32.7	0	0	1	0	2	1938.03	2217.59		47100000	517	528	TRUE
	Cytochrome bo(3) ubiquinol oxidase subunit 1 OS=Klebsiella aerogenes OX=548 GN=cyoB PE=3 SV=1	A0A447LCJ9	cyoB	uniprot-Klebsiella aerogenes.fasta	67569.6	1	7	10	33	0.0001	0.156	SFDEDVDYYVPVAEVEK	K	L	0.997	77.4	31.1	0	59.4	0	2	1	0	2	2462.24	4595.95		120000000	570	586	TRUE
	Cytochrome bo(3) ubiquinol oxidase subunit 1 OS=Klebsiella aerogenes OX=548 GN=cyoB PE=3 SV=1	A0A447LCJ9	cyoB	uniprot-Klebsiella aerogenes.fasta	67569.6	1	7	10	33	0.0001	0.156	LENQHFDEINK	K	A	0.997	61.1	30	18.6	54.1	0	3	8	0	2	1844.99	2601.39		7140000000	587	597	TRUE
NDH-2 D2-1	Protein name	Protein accession numbers	Alternate IDs	Database sources	Protein molecular weight (Da)	Protein identification probability	Exclusive unique peptide count	Exclusive unique spectrum count	Exclusive spectrum count	Percentage of total spectra	Percentage sequence coverage	Peptide sequence	Previous amino acid	Next amino acid	Best Peptide identification probability	Best Mascot Ion Score	Best Mascot Identity Score	Best Mascot Homology Score	Best Mascot Delta Ion Score	Number of identified +1H spectra	Number of identified +2H spectra	Number of identified +3H spectra	Number of identified +4H spectra	Number of enzymatic termini	Calculated +1H Peptide Mass (AMU)	Median Retention Time	Total Precursor Intensity	Total TIC	Peptide start index	Peptide stop index	Assigned	Other Proteins
	NADH dehydrogenase OS=Klebsiella aerogenes OX=548 GN=YA35_24205 PE=4 SV=1	A0A094XHE6,A0A0H3FZ94	EAE_16455,YA35_24205	uniprot-Klebsiella aerogenes.fasta	47372.1	1	9	11	31	0.0001	0.281	IVIVGGGAGGLELATQLGR	R	K	0.997	78.9	25.6	0	77.4	0	4	2	0	2	2010.19	4994.34		201000000	8	26	TRUE
	NADH dehydrogenase OS=Klebsiella aerogenes OX=548 GN=YA35_24205 PE=4 SV=1	A0A094XHE6,A0A0H3FZ94	EAE_16455,YA35_24205	uniprot-Klebsiella aerogenes.fasta	47372.1	1	9	11	31	0.0001	0.281	GELLVAER	K	K	0.988	32.3	28.7	17.8	24.6	0	1	0	0	2	1115.66	2314.1		89900000	104	111	TRUE
	NADH dehydrogenase OS=Klebsiella aerogenes OX=548 GN=YA35_24205 PE=4 SV=1	A0A094XHE6,A0A0H3FZ94	EAE_16455,YA35_24205	uniprot-Klebsiella aerogenes.fasta	47372.1	1	9	11	31	0.0001	0.281	ENCIFLDNPHQAR	K	R	0.983	30.6	28.6	0	30.6	0	0	2	0	2	1842.91	2345.19		320000000	136	148	TRUE
	NADH dehydrogenase OS=Klebsiella aerogenes OX=548 GN=YA35_24205 PE=4 SV=1	A0A094XHE6,A0A0H3FZ94	EAE_16455,YA35_24205	uniprot-Klebsiella aerogenes.fasta	47372.1	1	9	11	31	0.0001	0.281	YSANLGANGK	K	V	0.997	51.6	28.6	0	34.9	0	1	0	0	2	1453.81	2095.34		30100000	161	170	TRUE
	NADH dehydrogenase OS=Klebsiella aerogenes OX=548 GN=YA35_24205 PE=4 SV=1	A0A094XHE6,A0A0H3FZ94	EAE_16455,YA35_24205	uniprot-Klebsiella aerogenes.fasta	47372.1	1	9	11	31	0.0001	0.281	GLTNEALNVTLVEAGER	K	I	0.997	43	30.4	0	40.8	0	0	1	0	2	2015.1	4024.93		102000000	203	219	TRUE
	NADH dehydrogenase OS=Klebsiella aerogenes OX=548 GN=YA35_24205 PE=4 SV=1	A0A094XHE6,A0A0H3FZ94	EAE_16455,YA35_24205	uniprot-Klebsiella aerogenes.fasta	47372.1	1	9	11	31	0.0001	0.281	ILPALPPR	R	I	0.975	25.1	25	0	25.1	0	1	0	0	2	1105.73	3395.75		208000000	220	227	TRUE
	NADH dehydrogenase OS=Klebsiella aerogenes OX=548 GN=YA35_24205 PE=4 SV=1	A0A094XHE6,A0A0H3FZ94	EAE_16455,YA35_24205	uniprot-Klebsiella aerogenes.fasta	47372.1	1	9	11	31	0.0001	0.281	EIGGLETNR	K	I	0.994	36.5	29.2	16.9	23.5	0	3	0	0	2	1217.67	1866.09		275000000	284	292	TRUE
	NADH dehydrogenase OS=Klebsiella aerogenes OX=548 GN=YA35_24205 PE=4 SV=1	A0A094XHE6,A0A0H3FZ94	EAE_16455,YA35_24205	uniprot-Klebsiella aerogenes.fasta	47372.1	1	9	11	31	0.0001	0.281	INQLVVEPTLQTTR	R	D	0.997	63	27.7	13.6	59.9	0	7	7	0	2	1841.07	3707.65		1700000000	293	306	TRUE
	NADH dehydrogenase OS=Klebsiella aerogenes OX=548 GN=YA35_24205 PE=4 SV=1	A0A094XHE6,A0A0H3FZ94	EAE_16455,YA35_24205	uniprot-Klebsiella aerogenes.fasta	47372.1	1	9	11	31	0.0001	0.281	DPDIYAIGDCASCARPEGGFVPPR	R	A	0.981	30.8	29.4	0	30.8	0	0	2	0	2	2849.36	3542.6		268000000	307	330	TRUE
CydA	Protein name	Protein accession numbers	Alternate IDs	Database sources	Protein molecular weight (Da)	Protein identification probability	Exclusive unique peptide count	Exclusive unique spectrum count	Exclusive spectrum count	Percentage of total spectra	Percentage sequence coverage	Peptide sequence	Previous amino acid	Next amino acid	Best Peptide identification probability	Best Mascot Ion Score	Best Mascot Identity Score	Best Mascot Homology Score	Best Mascot Delta Ion Score	Number of identified +1H spectra	Number of identified +2H spectra	Number of identified +3H spectra	Number of identified +4H spectra	Number of enzymatic termini	Calculated +1H Peptide Mass (AMU)	Median Retention Time	Total Precursor Intensity	Total TIC	Peptide start index	Peptide stop index	Assigned	Other Proteins
	Cytochrome d terminal oxidase subunit 1 OS=Klebsiella aerogenes OX=548 GN=YA35_05980 PE=3 SV=1	A0A837JYW3	cydA / YA35_05980	uniprot-Klebsiella aerogenes.fasta	58011.5	1	8	12	124	0.0003	0.155	SVDKPVIGLK	R	D	0.997	42	25	0	42	0	1	0	0	2	1743.13	3019.13		59200000	299	308	TRUE
	Cytochrome d terminal oxidase subunit 1 OS=Klebsiella aerogenes OX=548 GN=YA35_05980 PE=3 SV=1	A0A837JYW3	cydA / YA35_05980	uniprot-Klebsiella aerogenes.fasta	58011.5	1	8	12	124	0.0003	0.155	DLMAQHEER	K	I	0.997	54.6	25.4	13.1	39.5	0	0	24	0	2	1373.67	991.562		71800000	309	317	TRUE
	Cytochrome d terminal oxidase subunit 1 OS=Klebsiella aerogenes OX=548 GN=YA35_05980 PE=3 SV=1	A0A837JYW3	cydA / YA35_05980	uniprot-Klebsiella aerogenes.fasta	58011.5	1	8	12	124	0.0003	0.155	AYALLEQLR	K	A	0.997	46.8	28.2	16	38.9	0	30	0	0	2	1305.77	4287.75		5140000000	324	332	TRUE
	Cytochrome d terminal oxidase subunit 1 OS=Klebsiella aerogenes OX=548 GN=YA35_05980 PE=3 SV=1	A0A837JYW3	cydA / YA35_05980	uniprot-Klebsiella aerogenes.fasta	58011.5	1	8	12	124	0.0003	0.155	DLGYGLLLK	K	R	0.997	60.2	25	17.5	53	0	16	0	0	2	1449.91	4642.07		2930000000	350	358	TRUE
	Cytochrome d terminal oxidase subunit 1 OS=Klebsiella aerogenes OX=548 GN=YA35_05980 PE=3 SV=1	A0A837JYW3	cydA / YA35_05980	uniprot-Klebsiella aerogenes.fasta	58011.5	1	8	12	124	0.0003	0.155	RYTPNVADATEEQIAK	K	A	0.997	57.7	30.2	0	49.7	0	0	2	0	2	2264.23	2658.64		223000000	359	374	TRUE
	Cytochrome d terminal oxidase subunit 1 OS=Klebsiella aerogenes OX=548 GN=YA35_05980 PE=3 SV=1	A0A837JYW3	cydA / YA35_05980	uniprot-Klebsiella aerogenes.fasta	58011.5	1	8	12	124	0.0003	0.155	DSIPSVAPLYFAFR	K	I	0.997	49.7	29.1	0	47	0	5	0	0	2	1811.99	5450.77		237000000	378	391	TRUE
	Cytochrome d terminal oxidase subunit 1 OS=Klebsiella aerogenes OX=548 GN=YA35_05980 PE=3 SV=1	A0A837JYW3	cydA / YA35_05980	uniprot-Klebsiella aerogenes.fasta	58011.5	1	8	12	124	0.0003	0.155	YHFEQSSAAIQSAR	R	-	0.997	59	29.9	13.8	58.8	0	11	15	0	2	1823.92	2092.85		6510000000	509	522	TRUE
